1 **The chromosomal-level genome assembly and comprehensive**  
2 **transcriptomes of Chinese razor clam (*Sinonovacula constricta*) with**  
3 **deep-burrowing life style and broad-range salinity adaptation**

4  
5 Yinghui Dong<sup>1,†</sup>, Qifan Zeng<sup>2,†</sup>, Jianfeng Ren<sup>3,†</sup>, Hanhan Yao<sup>1</sup>, Wenbin Ruan<sup>1</sup>, Liyuan  
6 Lv<sup>1</sup>, Lin He<sup>1</sup>, Qinggang Xue<sup>1</sup>, Zhenmin Bao<sup>2,4</sup>, Shi Wang<sup>2,5\*</sup>, Zihua Lin<sup>1,\*</sup>

7  
8  
9 <sup>1</sup>Key Laboratory of Aquatic Germplasm Resource of Zhejiang, College of Biological  
10 & Environmental Sciences, Zhejiang Wanli University, Ningbo 315100, China.

11  
12 <sup>2</sup>MOE Key Laboratory of Marine Genetics and Breeding, College of Marine Life  
13 Sciences, Ocean University of China, Qingdao 266003, China

14  
15 <sup>3</sup>Key Laboratory of Exploration and Utilization of Aquatic Genetic Resources,  
16 Ministry of Education, College of Fisheries and Life Science, Shanghai Ocean  
17 University, Shanghai, 201306, China.

18  
19 <sup>4</sup>Laboratory for Marine Fisheries Science and Food Production Processes, Pilot  
20 National Laboratory for Marine Science and Technology, Qingdao 266237, China

21  
22 <sup>5</sup>Laboratory for Marine Biology and Biotechnology, Pilot National Laboratory for  
23 Marine Science and Technology, Qingdao 266237, China

24  
25 <sup>†</sup>These authors contributed equally to this work.

26 Yinghui Dong, Email: [dongyinghui118@126.com](mailto:dongyinghui118@126.com)

27 Qifan Zeng, Email: [zengqifan@ouc.edu.cn](mailto:zengqifan@ouc.edu.cn)

28 Jianfeng Ren, Email: [jfren@shou.edu.cn](mailto:jfren@shou.edu.cn)

29 Hanhan Yao, Email: [yaohanhan1020@126.com](mailto:yaohanhan1020@126.com)

30 Wenbin Ruan, Email: [wbruan@163.com](mailto:wbruan@163.com)

31 Liyuan Lv, Email: [llyuan.2009@163.com](mailto:llyuan.2009@163.com)

32 Lin He, Email: [hlwithyou@qq.com](mailto:hlwithyou@qq.com)

33 Qinggang Xue, Email: [qxue@zwu.edu.cn](mailto:qxue@zwu.edu.cn)

34 Zhenmin Bao, [zmbao@ouc.edu.cn](mailto:zmbao@ouc.edu.cn)

35 \*To whom correspondence should be addressed: Zhihua Lin: [zhihua9988@126.com](mailto:zhihua9988@126.com);

36 Shi Wang: [swang@ouc.edu.cn](mailto:swang@ouc.edu.cn).

37

38

39

40

41

42

43

44

45

46

47

48

49

50

51

52

53

54

55

56

57

58

59

60 **Abstract**

61 **Background:** The Chinese razor clam, *Sinonovacula constricta*, is one of the  
62 commercially important marine bivalves with deep-burrowing lifestyle and  
63 remarkable adaptability of broad-range salinity. Despite its economic impact and  
64 representative of the less-understood deep-burrowing bivalve lifestyle, there are few  
65 genomic resources for exploring its unique biology and adaptive evolution. Herein,  
66 we reported a high-quality chromosomal-level reference genome of *S. constricta*, the  
67 first genome of the family Solenidae, along with a large amount of  
68 short-read/full-length transcriptomic data of whole-ontogeny developmental stages,  
69 all major adult tissues, and gill tissues under salinity challenge .

70 **Findings:** A total of 101.79 Gb and 129.73 Gb sequencing data were obtained with  
71 the PacBio and Illumina platforms, which represented approximately 186.63X  
72 genome coverage. In addition, a total of 160.90 Gb and 24.55 Gb clean data were also  
73 obtained with the Illumina and PacBio platforms for transcriptomic investigation. A  
74 *de novo* genome assembly of 1,340.13 Mb was generated, with a contig N50 of  
75 689.18 kb. Hi-C scaffolding resulted in 19 chromosomes with a scaffold N50 of 57.99  
76 Mb. The repeat sequences account for 50.71% of the assembled genome. A total of  
77 26,273 protein-coding genes were predicted and 99.5% of them were annotated.  
78 Phylogenetic analysis revealed that *S. constricta* diverged from the lineage of  
79 Pteriomorphia at approximately 494 million years ago. Notably, cytoskeletal protein  
80 tubulin and motor protein dynein gene families are rapidly expanded in the *S.*  
81 *constricta* genome and are highly expressed in the mantle and gill, implicating  
82 potential genomic bases for the well-developed ciliary system in the *S. constricta*.

83 **Conclusions:** The high-quality genome assembly and comprehensive transcriptomes  
84 generated in this work not only provides highly valuable genomic resources for future  
85 studies of *S. constricta*, but also lays a solid foundation for further investigation into  
86 the adaptive mechanisms of benthic burrowing mollusks.

87 **Keywords:** *Sinonovacula constricta*, genome, transcriptome, gene family, ciliary  
88 system

89

## 90 **Introduction**

91 The Chinese razor clam *Sinonovacula constricta* (Lamarck 1818) is a member of  
92 the Solenidae family of bivalve molluscs, recognizing for its straight razor-like shape  
93 and fragile shells (Figure 1A). It is widely distributed in the intertidal zone along the  
94 west Pacific Ocean and engages in a pelago-benthic life cycle (Figure 1B). As  
95 adaptation to a deep-burrowing lifestyle, the razor clam is characterized by smooth  
96 shells, muscular foot, and elongated siphons (Figure 1). Benefit from its relatively  
97 short production cycle and high productive efficiency, the razor clam has become one  
98 of the four most important maricultured bivalve species (together with oyster, scallop,  
99 and *Venerupis* spp.) in China, Japan, and Korea, with over 800,000 metric tons of  
100 production in 2016 (FAO, 2018).

101 As living in estuarine and intertidal region, the razor clam faces tremendous  
102 exposure to extreme environmental stresses such as drastic salinity fluctuation, highly  
103 variable temperature, high concentration of ammonia nitrogen and hydrogen sulfide.  
104 Unlike oysters, mussels and most clams with thick and sealed shells for protecting  
105 their soft bodies, the razor clam with two thin and unclosed shells has chosen a  
106 survival strategy of deep-burrowing lifestyle with high tolerance of a broad range of  
107 salinities (5-45‰), making it an ideal model to investigate the adaptive mechanisms  
108 of deep-burrowing lifestyle. Despite its economic impact and representative of the  
109 less-understood deep-burrowing bivalve lifestyle, there are few genomic resources for  
110 exploring its unique biology and adaptive evolution. Here, we generated the  
111 high-quality chromosomal-level genome assembly and comprehensive transcriptomes  
112 of *S. constricta* and investigated the transcriptomic changes under different  
113 environmental stresses. These genomic resources will lay a prime foundation for  
114 future studies of its lifestyle-related adaptive evolution and genetic improvement in  
115 commercial breeding programs.

116

## 117 **Genomic DNA preparation, PacBio and Illumina sequencing**

118 An individual *S. constricta* was collected from the brood stock at the genetic  
119 breeding research center of Zhejiang Wanli University. Genomic DNA was extracted

120 from muscle tissues using a phenol-chloroform method as described in the protocol  
121 (Green and Sambrook, 2012). High molecular weight genomic DNA was sheared into  
122 fragments of ~30 kb using a Covaris ultrasonicators (Covaris, Woburn, MA, USA).  
123 The fragments were enzymatically repaired and converted into SMRTbell™ template  
124 library following the manufacturer's instructions. Size-selection was performed to  
125 enrich the DNA fragments longer than 10 kb for sequencing on a Pacific Biosciences  
126 (PacBio) Sequel Single Molecule Real Time (SMRT) platform. The genomic library  
127 was sequenced in 6 cells, generating 10,549,576 subreads with a N50 length of 13,619  
128 bp, and accounting for a total of 101.79 Gb. A paired-end Illumina library with an  
129 insert size of 300 bp were prepared with an Illumina Genomic DNA sample  
130 Preparation kit and sequenced on an Illumina Xten system, yielding a total of 129.73  
131 Gb reads with an insert size of 350 bp ([Supplementary Table S1](#)).

132

### 133 **Estimation of the genome size and sequencing coverage**

134 The Illumina short reads were first trimmed to remove adaptors and reads with  
135 more than 10% ambiguous or more than 20% low-quality bases using Trimmomatic  
136 (Bolger et al., 2014). The distribution of 17-mer frequency was estimated using the  
137 clean reads. A total of  $10^{10}$  k-mer was identified with the peak depth of coverage  
138 being 80. Based on the formula: genome size = k-mer number/peak depth (Varshney  
139 et al., 2011), the genome size of *S. constricta* was estimated to be 1,244.27 Mb, with a  
140 heterozygous ratio of 1.53% and repeat rate of 53.12% ([Supplementary Figure S1](#)).

141

### 142 **De novo genome assembly and quality assessment**

143 PacBio long reads were corrected and assembled using the Falcon package (Chin et  
144 al., 2016). Briefly, all the raw reads yielded by Pacbio platform were aligned to each  
145 other to identify overlaps with DALIGNER. The overlap data and raw subreads were  
146 then processed for consensus calling. After the error-correction, overlaps were  
147 detected in the preassembled error-corrected reads and used to construct a directed  
148 fragment assembly string graph. Contigs were constructed by finding the paths from  
149 the string graph. The consensus calling of preceding assembly was performed with

150 Quiver. Subsequently, the paired-end clean reads yielded by Illumina platform were  
151 aligned to polish the assembly using Pilon (Walker et al., 2014). The resulting  
152 assembly consisted of 10,981 contigs, comprising 1,331.97 Mb with a contig N50 of  
153 678,857 bp and GC contents of 35.46% (Table 1).

154 To assess the integrity of the genome assembly, Illumina short-insert library reads  
155 were mapped to the contigs using BWA (version 0.6.2). In summary, 88.90% of the  
156 assembled genome sequences were covered by 93.93% of the total reads  
157 (Supplementary Table S2). The genome completeness was also evaluated using both  
158 Core Eukaryotic Genes Mapping Approach (CEGMA) analysis (Parra et al., 2007)  
159 and Benchmarking Universal Single-Copy Orthologs (BUSCO version 3) analysis  
160 (Waterhouse et al., 2017). The CEGMA analysis identified 227 of the 248 core  
161 eukaryotic genes (91.53%), and the BUSCO analysis unveiled 868 of the 978  
162 near-universal single-copy metazoan orthologs (88.7%), indicating a high integrity of  
163 the genome assembly (Supplementary Table S3 and S4).

164

#### 165 **Illumina transcriptome sequencing and analysis**

166 Transcriptomic samples from different developmental stages and different adult  
167 tissues were collected and sequenced for genome annotation. Embryos at four  
168 developmental stages (eggs, four cells, blastulae, gastrulae), and larvae at four  
169 developmental stages (trochophore larvae, D-shaped larvae, umbo larvae, and juvenile)  
170 were collected at the hatchery of genetic breeding research center of Zhejiang Wanli  
171 University. Artificial fertilization and larval culture were performed as previously  
172 described (Dong et al., 2012). For each developmental stage, over 1,000 individuals  
173 were collected for RNA extraction. Eight tissues (Figure 1A), including gill, digestive  
174 gland, foot, mantle, adductor muscle, siphon, gonad (testis and ovary) were dissected  
175 from one to three adult individuals and stored at -80°C after flash frozen in liquid  
176 nitrogen.

177 Transcriptomic samples under salinities of 3‰, 25‰, and 38‰ were collected and  
178 sequenced to identify genes and pathways involved in salt tolerance. The *S. constricta*  
179 were subjected to salt stress for 16 hours under 22°C at extreme concentration of

180 low-salinity (3‰) and high-salinity (38‰) with the control concentration of  
181 normal-salinity (25‰). Three replicate tanks for each group were set and each  
182 replicate included 10 individuals. For the low-salinity group, the salinity was decreased  
183 3‰ per hour though pouring into fresh water to target salinity of 3‰, and then  
184 maintained for 16 hours. For the high-salinity groups, the salinity was raised 2‰ per  
185 hour though pouring into artificial sea water to target salinity of 38‰, and then  
186 maintained for 16 hours. Gills were dissected from three individuals of each replicate  
187 and stored at -80°C.

188 Total mRNA was extracted from all the collected samples with TRIzol reagent  
189 (OMEGA, America) following the manufacturer's instructions. A paired-end Illumina  
190 library was constructed for each sample with an insert size of 300 bp and sequenced  
191 on an Illumina X Ten system. Around 5-7 Gb of paired-end raw reads were yielded for  
192 each sample. Clean reads were obtained by removing reads containing adapter, reads  
193 containing ploy-N and low-quality reads by Trimmomatic (Bolger et al., 2014)  
194 ([Supplementary Table S5](#)). The clean reads were aligned to the indexed *S. constricta*  
195 reference genome using Hisat2 version 2.0.5 (Kim et al., 2015). The clean reads in the  
196 samples of different adult tissues and salt stress were mapped onto the reference  
197 genome with high proportion of around 70-80%, while samples of different  
198 development stages with relative low proportion because of mixed thousand  
199 individuals increasing the high SNP heterozygosity ([Supplementary Table S6](#)). The  
200 featureCounts version 1.5.0 (Liao et al., 2014) was used to count the reads numbers  
201 mapped to each gene and the gene expression level was calculated as FPKM  
202 (Fragments Per Kilobase of transcript sequence per Millions base pairs) for each gene.

203 The identification of differentially expressed genes (DEGs) between different  
204 salinity groups was performed using the DESeq2 R package version 1.16.1 with an  
205 adjusted P-value <0.05 (Love et al., 2014). The numbers of up- and down-regulated  
206 DEGs were 462 and 655 between the high-salinity group versus the normal-salinity  
207 group, respectively while the numbers of up- and down-regulated DEGs were 898 and  
208 826 between the low-salinity group versus the normal-salinity group, respectively  
209 ([Supplementary Figure S2](#)). Gene Ontology (GO) enrichment analysis of DEGs was

210 implemented by the clusterProfiler R package with corrected P-value <0.05  
211 considered significantly enriched GO terms (Yu et al., 2012). The clusterProfiler R  
212 package is also used to test the statistical enrichment of DEGs in KEGG pathways  
213 (Yu et al., 2012). The GO enrichment results demonstrated that the DEGs were  
214 significantly enriched in the biological processes of transmembrane transport  
215 (GO:0055085) and aminoglycan metabolic process (GO:0006022) and the molecular  
216 functions of transmembrane transporter activity (GO:0022857) and ([Supplementary](#)  
217 [Figure S3](#)). The KEGG pathway enrichment results indicated that the DEGs were  
218 significantly enriched in amino acid metabolic pathways such as glycine, serine and  
219 threonine metabolism, and arginine and proline metabolism, and the energy metabolic  
220 pathways such as glycolysis/gluconeogenesis and citrate cycle ([Supplementary Figure](#)  
221 [S4](#)).

222

### 223 **Full-length transcriptome sequencing and analysis**

224 Full-length RNA sequencing was also performed using the mixed RNAs from the  
225 samples of eight development stages and eight adult tissues. Three libraries with  
226 different insert lengths, e.g. 1-2k, 2-3k, and 3-6k, were constructed and sequenced on  
227 a PacBio Sequel platform. A total of 1,064,194 post-filter polymerase reads were  
228 obtained from 7 SMRT cells, including 688,944 full-length non-chimeric reads  
229 ([Supplementary Table S7](#)). The full-length RNA transcriptomic analysis was  
230 performed with the SMRT Link v4.0.0 software suite  
231 (<https://www.pacb.com/support/software-downloads>). After redundant sequences  
232 clustering using the ICE (Iterative Clustering and Error correction) algorithm,  
233 consensus sequences building using the pbdagcon tool with DAGCon (Directed  
234 Acyclic Graph Consensus) algorithm, and consensus sequence polishing with Quiver ,  
235 a total of 61,620 high-quality (>0.99) and 358,297 low-quality (<0.99) transcript  
236 sequences were obtained. Then, the transcript sequences were polished and corrected  
237 using Illumina reads with LoRDEC (Salmela and Rivals, 2014). Finally, the corrected  
238 transcripts were further clustered with CD-HIT (version 4.6) (Li and Godzik, 2006),  
239 resulting in 75,225 Unigenes and 276,484 transcript isoforms. The full-length



240 transcripts were further used to annotate the protein-coding genes in the genome as  
241 the direct evidences. The statistical information for full-length transcriptome analysis  
242 is listed in [Supplementary Table S7](#).

243

#### 244 **Repetitive sequence annotation**

245 Repetitive sequences in the genome assembly were identified through *ab initio*  
246 prediction and homology-based searches. RepeatScout (version 1.0.5) and Repeat  
247 Modeler version 1.0.11 (<http://www.repeatmasker.org>) were used for *de novo*  
248 identification of repeat families in the *S. constricta* genome. Full length long terminal  
249 repeat (LTR) retrotransposons were also identified using the LTR-finder (version 1.0.2)  
250 (Xu and Wang, 2007) with the parameters “-E -C”. Tandem Repeats Finder (TRF  
251 version 4.09) (Benson, 1999) was used to screen tandem repeats with the parameters  
252 “match=2, mismatching penalty=7, indel penalty=7, match probability=80, indel  
253 probability=10, minimum alignment score=50, maximum period size=500”. The  
254 predicted repetitive sequences along with the RepBase database (Bao et al., 2015)  
255 were used for homology-based searches using Repeatmasker (version 4.5.0) with the  
256 parameters “-a -nolow -no\_is -norna -parallel 32 -small -xsmall -poly -e ncbi -pvalue  
257 0.0001” (Tarailo-Graovac and Chen, 2009).

258 Finally, a total of 675,404,889 bp repetitive sequences were identified, accounting  
259 for 50.71% of the assembled genome ([Table 2](#)), which is consistent with our genome  
260 survey result of 53.12%. Repetitive sequences were dominated by tandem repeats  
261 (15.39%) and followed by DNA transposons (14.38%) and LTR retrotransposons  
262 (10.84%) ([Table 2](#)).

263

#### 264 **Protein-coding gene prediction and annotation**

265 Gene annotation was performed based on *de novo* prediction, homology-based  
266 searches, and transcriptome assisted methods. Protein sequences of Yesso scallop  
267 (*Patinopecte yessoensis*), Pacific oyster (*Crassostrea gigas*), owl limpet (*Lottia*  
268 *gigantea*), octopus (*Octopus bimaculoides*), leech (*Helobdella robusta*), nematode  
269 (*Caenorhabditis elegans*), fruit fly (*Drosophila melanogaster*), sea urchin

270 (*Strongylocentrotus purpuratus*), ascidian (*Ciona intestinalis*), Florida lancelet  
271 (*Branchiostoma floridae*), and human (*Homo sapiens*) were downloaded from NCBI  
272 and aligned to the genome assembly using TBLASTN with the parameters “-evalue  
273 1e-5”. The gene structures were predicted with GeneWise (version 2.4.1) (Doerks et  
274 al., 2002). The Illumina RNA-seq reads of the eight tissues and eight developmental  
275 stages were aligned to the genome assembly using Tophat (version 2.1.1) (Trapnell et  
276 al., 2009). Cufflinks (version 2.1.0) (Trapnell et al., 2010) was used to generate gene  
277 models with the parameter “-multi-read-correct”. The resulting GTF file along with  
278 the PacBio Iso-seq transcripts was utilized to model gene structures with the PASA  
279 pipeline (version 2.0.2) (Haas et al., 2008).

280 Five *de novo* gene prediction packages, including Augustus (version 2.5.5) (Stanke  
281 et al., 2006), glimmerHMM (version 3.01) (Majoros et al., 2004), SNAP (version  
282 2006-07-28) (Leskovec and Susic, 2016), Geneid (version 1.4) (Parra et al., 2000),  
283 and Genscan (version 3.1) (Burge and Karlin, 1997) were used to predict genes with  
284 the repeat-masked genome sequences by default settings. All the gene model  
285 evidences were integrated using EVidenceModeler (version 1.1.1) (Haas et al., 2008).  
286 Finally, 26,273 protein-coding genes were identified in the *S. constricta* genome  
287 ([Supplementary Table S8](#)).

288 The functional annotations were performed by aligning the predicted protein  
289 sequences to public databases including KEGG, SwissProt and NCBI-NR databases  
290 using BLASTP with the E-value threshold of 1e-5. InterProScan (v.4.8) (Jones et al.,  
291 2014) was also used to identify motifs and domains by searching the Pfam, InterPro  
292 and Gene Ontology (GO) databases. Taken together, 26,140 (99.5%) of the 26,273  
293 genes could be annotated by at least one database ([Table 3](#)).

294

### 295 **Noncoding RNA prediction and annotation**

296 The noncoding RNA genes, including miRNAs, rRNAs, snRNAs, and tRNAs, were  
297 annotated in the *S. constricta* genome. tRNAs were predicted by tRNAscan-SE 2.0  
298 (Lowe and Chan, 2016) with eukaryote parameters. The miRNAs and snRNAs were  
299 screened using INFERNAL 1.1.2 against the Rfam database (version 14.1) (Kalvari et

300 al., 2018) with default parameters. Finally, 968 miRNAs, 3,354 tRNAs, 822 rRNAs,  
301 and 298 snRNAs were identified ([Supplementary Table S9](#)).

302

### 303 **Gene family and phylogenetic analysis**

304 Fifteen Eumetazoa species were selected for gene family analysis, including *H.*  
305 *sapiens*, *B. floridae*, *D. melanogaster*, European honey bee (*Apis mellifera*),  
306 Californian leech (*Helobdella robusta*), ocean-dwelling worm (*Capitella teleta*), *O.*  
307 *bimaculoides*, *L. gigantea*, California sea hare (*Aplysia californica*), *C. gigas*,  
308 American oyster (*Crassostrea virginica*), Sydney rock oyster (*Saccostrea glomerata*),  
309 *P. yessoensis*, Chinese scallop (*Chlamys farreri*), and Starlet sea anemone  
310 (*Nematostella vectensis*). All data were downloaded from either NCBI or Ensembl.  
311 The longest protein sequence was selected to represent the gene with multiple  
312 alternative splicing isoforms. Gene family clusters from all the 16 species were first  
313 assigned using OrthoMCL (version 2.0.9) (Li et al., 2003) with an inflation value of  
314 1.5. CAFE (version 3) (De Bie et al., 2006) was used to analyze gene family  
315 expansion and contraction under maximum likelihood framework. The protein-coding  
316 genes from all the 16 species were assigned into 39,058 families with 337 strict  
317 single-copy orthologs. In the *S. constricta* genome, a total of 12,945 gene families  
318 were identified, 803 of which were specifically possessed by *S. constricta*. Compared  
319 with the other 15 species, *S. constricta* has 193 expanded and 31 contracted gene  
320 families ([Figure 2](#)). Notably, cytoskeletal protein alpha tubulin (*TUA*) family and  
321 motor protein dynein heavy chain (*DYH*) family are rapidly expanded in the *S.*  
322 *constricta* genome ([Figure 3A](#)). They play vital roles in the microtubule architecture  
323 and the bending movement of cilia (Mohri et al., 2012). The razor clam has a  
324 well-developed ciliary system for gill filtering, food-particles retaining, and water  
325 pumping (Morton, 1984). The adjoining cilia generate effective beat through  
326 coordinated wavelike movements. The pumping rate of the ciliary system in the gill  
327 and mantle cavity can be adjusted to generate powerful currents to facilitate the  
328 principal sorting and retaining of suspended particles in the labial palps. Effluxes can  
329 also be ejected from the pedal gape to flush away sources of irritation detected by the

330 sensory tentacles (Morton, 1984). The transcriptomic data revealed that the *TUA* and  
331 *DYH* genes are highly expressed in the gills (Figure 3B and 3C), suggesting that the  
332 expansion of these genes could be an adaptation to the deep-burrowing lifestyle.

333 Phylogenetic inference of the 16 species was performed with the 337 single-copy  
334 orthologs. Multiple sequences alignment was conducted for the protein sequences of  
335 each ortholog gene using MUSCLE (version 3.8.31) (Edgar, 2004) separately. The  
336 alignments for all the orthologs were then concatenated into a super alignment matrix  
337 with 241,349 amino acids. RAxML (version 8.2.12) (Stamatakis, 2014) was used to  
338 infer the alignment matrix by a maximum likelihood method with the substitution  
339 model PROTGAMMAAUTO. Bootstrapping with 100 replicates was used for node  
340 support. Divergence time between species was estimated using MCMCTree in PAML  
341 package (version 4.7a) (Yang, 1997) with the parameters of “burn-in = 1,000,  
342 sample-number = 1,000,000, sample-frequency = 2”. The constructed maximum  
343 likelihood phylogenetic tree revealed that *S. constricta* clustered with other bivalve  
344 species and diverged ~494 million years ago (Mya) from the lineage leading to  
345 oysters and scallops (Figure 2).

346

#### 347 **Hi-C scaffolding and macro-synteny analysis**

348 Adductor muscle tissue of a razor clam from the same population was collected for  
349 Hi-C library construction. The tissue specimen was fixed with 1% formaldehyde and  
350 the genomic DNA was cross-linked, digested by restriction enzymes HindIII, labeled  
351 with biotinylated residue, and end repaired. The library was sequenced on an Illumina  
352 NovaSeq platform, generating 156.73 G of raw reads. The raw reads were truncated at  
353 the junctions and aligned to the polished genome using BWA (version 0.7.17) with  
354 default parameters. Only the unique aligned reads with a mapping quality over 20  
355 were further processed. After filtering invalid interaction pairs by HiC-Pro (v.2.8.0)  
356 (Servant et al., 2015), 30.32% of the clean reads were valid pairs and utilized to  
357 evaluate the interaction strength among whole genome contigs. Lachesis (version  
358 2e27abb) was used to cluster and anchor the contigs to the chromosomes using an  
359 agglomerative hierarchical clustering method (Burton et al., 2013). Finally, 3,068

360 contigs, accounting for 87.82% of the total bases, were clustered into 19 linkage  
361 groups (Figure 4A), which was consistent with the karyotype revealed by previous  
362 studies (Wang et al., 1998). The ancient ortholog genes exhibited remarkable  
363 preservation of ancestral bilaterian linkage groups (Simakov et al., 2013; Wang et al.,  
364 2017) with a conservation index (CI) of 0.71, indicating the considerable accuracy of  
365 the Hi-C clustering (Figure 4B).

366

### 367 **Conclusions**

368 We assembled a high-quality chromosomal-level reference genome of *S. constricta*,  
369 the first genome of the family Solenidae, along with comprehensive transcriptomic  
370 data of whole-ontogeny developmental stages and all major tissues (under normal and  
371 stressed conditions). The genomic and transcriptomic resources reported here would  
372 lay a prime foundation for future studies to elucidate the razor clam' adaptive traits  
373 relating to deep-burrowing lifestyle (e.g., thin shells, advanced ciliary and siphon  
374 system, , extraordinary adaption to broad-range salinity and high concentration of  
375 ammonia nitrogen and hydrogen sulfide) and genetic improvement in commercial  
376 breeding programs.

377

### 378 **Ethics approval and consent to participate**

379 All experimental procedures were approved by the Institutional Animal Care and  
380 Use Committee (IACUC) of Zhejiang Wanli University, China. All participants  
381 consent to publish the work under the "Consent to publish" heading.

382

### 383 **Data availability**

384 The *S. constricta* genome assembly is available at NCBI (BioProject:  
385 PRJNA559038). RNA sequencing data files are available through the NCBI Sequence  
386 Read Archive (BioProject: PRJNA559056). The *S. constricta* genome assembly and  
387 annotation files also could be downloaded from the website  
388 <http://202.121.66.128/clam-genome/zwu.htm>.

389

390 **Acknowledgements**

391 This work was financially supported by the National Key Research and  
392 Development Program of China (No.2018YFD0901405), Zhejiang Major Program of  
393 Science and Technology (No.2016C02055-9), Modern Agro-industry Technology  
394 Research System (No. CARS-49).

395

396 **Author contributions**

397 Y. D., Z. L. and Z. B. conceived the project. H. Y., W. R. and L.H. conducted the  
398 environmental stress and collected the samples. Q. Z., S. W., J. R. and L. L. performed  
399 the genome assembly, annotation, transcriptome analysis and other bioinformatics  
400 analysis. Y. D., J. R., Q. Z., S. W. and Q. X. wrote and revised the manuscript. All  
401 authors read and approved the final manuscript.

402

403

404 **Competing interests**

405 The authors declare that they have no competing interests.

406

407

408

409

410

411

412

413

414

415

416

417

418

419

420 **Reference**

- 421 Bao, W., Kojima, K.K., and Kohany, O. (2015). Repbase Update, a database of repetitive elements  
422 in eukaryotic genomes. *Mobile DNA* 6, 11.
- 423 Benson, G. (1999). Tandem repeats finder: a program to analyze DNA sequences. *Nucleic acids*  
424 *research* 27, 573-580.
- 425 Bolger, A.M., Lohse, M., and Usadel, B. (2014). Trimmomatic: a flexible trimmer for Illumina  
426 sequence data. *Bioinformatics* 30, 2114-2120.
- 427 Burge, C., and Karlin, S. (1997). Prediction of complete gene structures in human genomic DNA.  
428 *Journal of molecular biology* 268, 78-94.
- 429 Burton, J.N., Adey, A., Patwardhan, R.P., Qiu, R., Kitzman, J.O., and Shendure, J. (2013).  
430 Chromosome-scale scaffolding of de novo genome assemblies based on chromatin interactions.  
431 *Nature biotechnology* 31, 1119-1125.
- 432 Chin, C.S., Peluso, P., Sedlazeck, F.J., Nattestad, M., Concepcion, G.T., Clum, A., Dunn, C.,  
433 O'Malley, R., Figueroa-Balderas, R., Morales-Cruz, A., *et al.* (2016). Phased diploid genome  
434 assembly with single-molecule real-time sequencing. *Nature methods* 13, 1050-1054.
- 435 De Bie, T., Cristianini, N., Demuth, J.P., and Hahn, M.W. (2006). CAFE: a computational tool for  
436 the study of gene family evolution. *Bioinformatics* 22, 1269-1271.
- 437 Doerks, T., Copley, R.R., Schultz, J., Ponting, C.P., and Bork, P. (2002). Systematic identification  
438 of novel protein domain families associated with nuclear functions. *Genome research* 12, 47-56.
- 439 Dong, Y.H., Yao, H.H., Zhang, P.Y., Shen, P.Y., Liiu, H.M., and Lin, Z.H. (2012). Cytological  
440 observation on fertilization and early cleavage in *Sinonovaula constricta*. *Journal of fisheries of*  
441 *China* 36, 1400-1409.
- 442 Edgar, R.C. (2004). MUSCLE: multiple sequence alignment with high accuracy and high  
443 throughput. *Nucleic acids research* 32, 1792-1797.
- 444 FAO (2018). FAO yearbook. Fishery and Aquaculture Statistics 2016.  
445 <http://www.fao.org/fishery/publications/yearbooks/en>.
- 446 Green, M., and Sambrook, J. (2012). *Molecular Cloning: A Laboratory Manual*. 4th Edition, Vol.  
447 II, Cold Spring Harbor Laboratory Press, New York.
- 448 Haas, B.J., Salzberg, S.L., Zhu, W., Pertea, M., Allen, J.E., Orvis, J., White, O., Buell, C.R., and  
449 Wortman, J.R. (2008). Automated eukaryotic gene structure annotation using EVIDENCEModeler  
450 and the Program to Assemble Spliced Alignments. *Genome biology* 9, R7.
- 451 Jones, P., Binns, D., Chang, H.Y., Fraser, M., Li, W., McAnulla, C., McWilliam, H., Maslen, J.,  
452 Mitchell, A., Nuka, G., *et al.* (2014). InterProScan 5: genome-scale protein function classification.  
453 *Bioinformatics* 30, 1236-1240.
- 454 Kalvari, I., Nawrocki, E.P., Argasinska, J., Quinones-Olvera, N., Finn, R.D., Bateman, A., and  
455 Petrov, A.I. (2018). Non-Coding RNA Analysis Using the Rfam Database. *Current protocols in*  
456 *bioinformatics* 62, e51.
- 457 Kim, D., Langmead, B., and Salzberg, S.L. (2015). HISAT: a fast spliced aligner with low memory  
458 requirements. *Nature methods* 12, 357-360.
- 459 Leskovec, J., and Soscic, R. (2016). SNAP: A General Purpose Network Analysis and Graph  
460 Mining Library. *ACM transactions on intelligent systems and technology* 8.
- 461 Li, L., Stoeckert, C.J., Jr., and Roos, D.S. (2003). OrthoMCL: identification of ortholog groups for  
462 eukaryotic genomes. *Genome research* 13, 2178-2189.
- 463 Li, W., and Godzik, A. (2006). Cd-hit: a fast program for clustering and comparing large sets of

- 464 protein or nucleotide sequences. *Bioinformatics* 22, 1658-1659.
- 465 Liao, Y., Smyth, G.K., and Shi, W. (2014). featureCounts: an efficient general purpose program for  
466 assigning sequence reads to genomic features. *Bioinformatics* 30, 923-930.
- 467 Love, M.I., Huber, W., and Anders, S. (2014). Moderated estimation of fold change and dispersion  
468 for RNA-seq data with DESeq2. *Genome biology* 15, 550.
- 469 Lowe, T.M., and Chan, P.P. (2016). tRNAscan-SE On-line: integrating search and context for  
470 analysis of transfer RNA genes. *Nucleic acids research* 44, W54-57.
- 471 Majoros, W.H., Pertea, M., and Salzberg, S.L. (2004). TigrScan and GlimmerHMM: two open  
472 source ab initio eukaryotic gene-finders. *Bioinformatics* 20, 2878-2879.
- 473 Mohri, H., Inaba, K., Ishijima, S., and Baba, S.A. (2012). Tubulin-dynein system in flagellar and  
474 ciliary movement. *Proceedings of the Japan Academy Series B, Physical and biological sciences*  
475 88, 397-415.
- 476 Morton, B. (1984). The functional morphology of *Sinonovucufu constvictu* with a discussion on  
477 the taxonomic status of the Novaculininae (Bivalvia). *J Zool, Lond* 202, 299-325.
- 478 Parra, G., Blanco, E., and Guigo, R. (2000). GeneID in *Drosophila*. *Genome research* 10, 511-515.
- 479 Parra, G., Bradnam, K., and Korf, I. (2007). CEGMA: a pipeline to accurately annotate core genes  
480 in eukaryotic genomes. *Bioinformatics* 23, 1061-1067.
- 481 Salmela, L., and Rivals, E. (2014). LoRDEC: accurate and efficient long read error correction.  
482 *Bioinformatics* 30, 3506-3514.
- 483 Servant, N., Varoquaux, N., Lajoie, B.R., Viara, E., Chen, C.J., Vert, J.P., Heard, E., Dekker, J.,  
484 and Barillot, E. (2015). HiC-Pro: an optimized and flexible pipeline for Hi-C data processing.  
485 *Genome biology* 16, 259.
- 486 Simakov, O., Marletaz, F., Cho, S.J., Edsinger-Gonzales, E., Havlak, P., Hellsten, U., Kuo, D.H.,  
487 Larsson, T., Lv, J., Arendt, D., *et al.* (2013). Insights into bilaterian evolution from three spiralian  
488 genomes. *Nature* 493, 526-531.
- 489 Stamatakis, A. (2014). RAxML version 8: a tool for phylogenetic analysis and post-analysis of  
490 large phylogenies. *Bioinformatics* 30, 1312-1313.
- 491 Stanke, M., Keller, O., Gunduz, I., Hayes, A., Waack, S., and Morgenstern, B. (2006).  
492 AUGUSTUS: ab initio prediction of alternative transcripts. *Nucleic acids research* 34, W435-439.
- 493 Trapnell, C., Pachter, L., and Salzberg, S.L. (2009). TopHat: discovering splice junctions with  
494 RNA-Seq. *Bioinformatics* 25, 1105-1111.
- 495 Trapnell, C., Williams, B.A., Pertea, G., Mortazavi, A., Kwan, G., van Baren, M.J., Salzberg, S.L.,  
496 Wold, B.J., and Pachter, L. (2010). Transcript assembly and quantification by RNA-Seq reveals  
497 unannotated transcripts and isoform switching during cell differentiation. *Nature biotechnology*  
498 28, 511-515.
- 499 Varshney, R.K., Chen, W., Li, Y., Bharti, A.K., Saxena, R.K., Schlueter, J.A., Donoghue, M.T.,  
500 Azam, S., Fan, G., Whaley, A.M., *et al.* (2011). Draft genome sequence of pigeonpea (*Cajanus*  
501 *cajan*), an orphan legume crop of resource-poor farmers. *Nature biotechnology* 30, 83-89.
- 502 Walker, B.J., Abeel, T., Shea, T., Priest, M., Abouelliel, A., Sakthikumar, S., Cuomo, C.A., Zeng,  
503 Q., Wortman, J., Young, S.K., *et al.* (2014). Pilon: an integrated tool for comprehensive microbial  
504 variant detection and genome assembly improvement. *PloS one* 9, e112963.
- 505 Wang, J.X., Zhao, X.F., Zhou, L.H., and Xiang, J.H. (1998). Chromosome study of *Sinonovacula*  
506 *constricta* (Bivalvia) *Oceanologia Et Limnologia Sinica* 29, 191-196.
- 507 Wang, S., Zhang, J., Jiao, W., Li, J., Xun, X., Sun, Y., Guo, X., Huan, P., Dong, B., Zhang, L., *et*



508 *al.* (2017). Scallop genome provides insights into evolution of bilaterian karyotype and  
509 development. *Nature ecology & evolution* *1*, 120.  
510 Waterhouse, R.M., Seppey, M., Simao, F.A., Manni, M., Ioannidis, P., Klioutchnikov, G.,  
511 Kriventseva, E.V., and Zdobnov, E.M. (2017). BUSCO applications from quality assessments to  
512 gene prediction and phylogenomics. *Molecular biology and evolution*.  
513 Xu, Z., and Wang, H. (2007). LTR\_FINDER: an efficient tool for the prediction of full-length LTR  
514 retrotransposons. *Nucleic acids research* *35*, W265-268.  
515 Yang, Z. (1997). PAML: a program package for phylogenetic analysis by maximum likelihood.  
516 *Computer applications in the biosciences : CABIOS* *13*, 555-556.  
517 Yu, G., Wang, L.G., Han, Y., and He, Q.Y. (2012). clusterProfiler: an R package for comparing  
518 biological themes among gene clusters. *Omics : a journal of integrative biology* *16*, 284-287.  
519  
520  
521  
522  
523  
524  
525  
526  
527  
528  
529  
530  
531  
532  
533  
534  
535  
536  
537  
538  
539  
540  
541  
542  
543  
544  
545

546 **Tables**

547

548 **Table 1.** Statistics of the genome assembly of *Sinonovacula constricta*

| Types    | Number | Length (bp)   | N50 (bp)   | Maximum (bp) | GC content (%) |
|----------|--------|---------------|------------|--------------|----------------|
| Contig   | 10,981 | 1,331,972,725 | 678,857    | 5,402,231    | 35.46          |
| Scaffold | 7,932  | 1,332,277,427 | 57,991,182 | 93,300,556   | 35.46          |

549

550

551

552

553 **Table 2.** Statistics of the repetitive sequences

| Type          | Repeat size (bp) | % of genome |
|---------------|------------------|-------------|
| DNA           | 191,499,094      | 14.38       |
| LINE          | 71,938,692       | 5.4         |
| LTR           | 144,451,530      | 10.84       |
| SINE          | 5,528,172        | 0.42        |
| Tandem repeat | 204,889,587      | 15.38       |
| Other         | 157,232          | 0.01        |
| Unknown       | 56,940,582       | 4.27        |
| Total         | 675,404,889      | 50.71       |

554

555

556

557

558

559

560

561 **Table 3.** Statistics of gene annotation to different databases

| Annotation database | Number of annotated genes | Percentage (%) |
|---------------------|---------------------------|----------------|
| NR                  | 23,844                    | 90.88          |
| Swiss-Prot          | 18,131                    | 69.1           |
| KEGG                | 18,928                    | 72.14          |
| InterProScan        | 25,475                    | 97.1           |
| Pfam                | 15,391                    | 58.66          |
| GO                  | 22,956                    | 87.49          |
| Total               | 26,140                    | 99.50          |

562

563

564

565

566

567

568

569

570

571

572

573

574

575

576

577

578

579

580 **Figures**

581

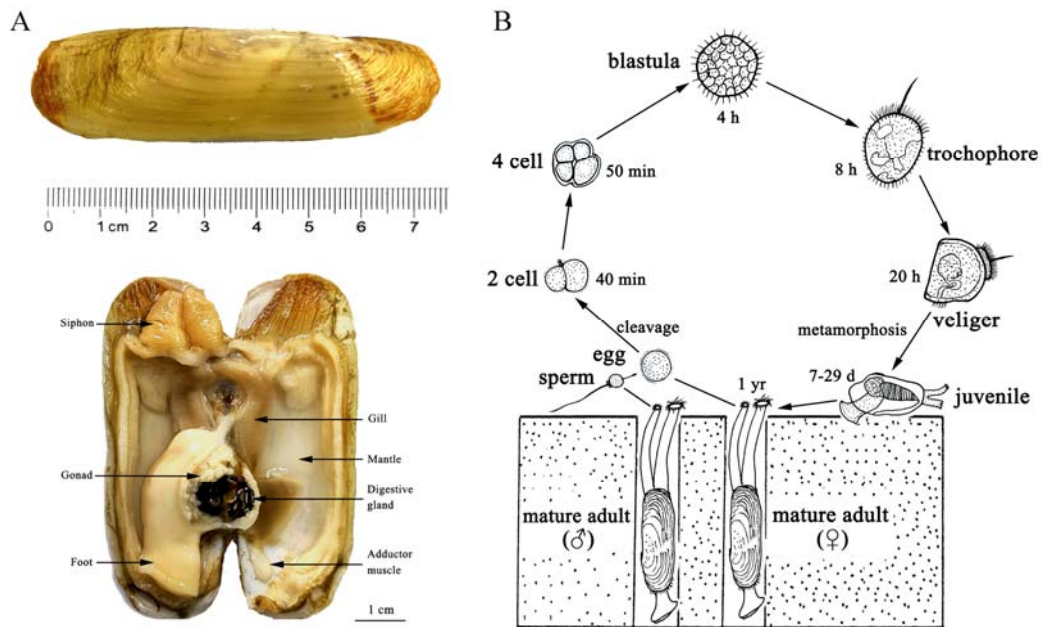

582

583 **Figure 1.** A. The appearance and anatomic structures of an adult razor clam. B. A

584 pelago-benthic life cycle of the razor clam.

585

586

587

588

589

590

591

592

593

594

595

596

597

598

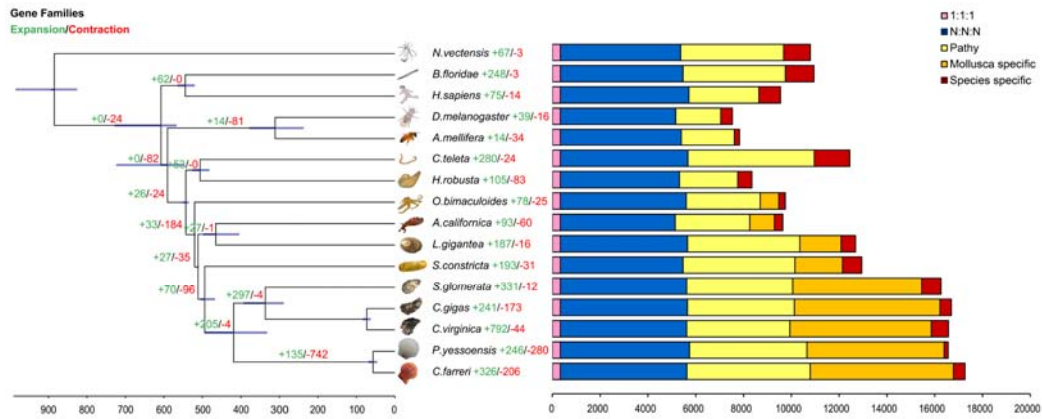

599

600 **Figure 2.** Phylogenetic tree and number of shared orthologs among *S. constricta* and

601 other animal species. Numbers of gene families undergoing expansion and contraction

602 for each lineage are exhibited as red and green, respectively.

603

604

605

606

607

608

609

610

611

612

613

614

615

616

617

618

619

620

621

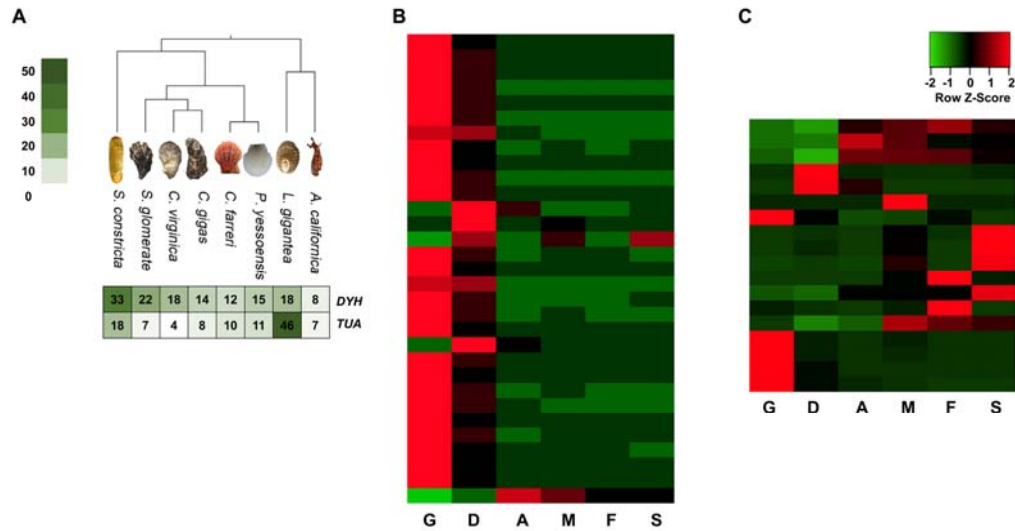

622

623 **Figure 3. A.** The comparison of the copy numbers of dynein heavy chain (*DYH*) and  
 624 alpha tubulin (*TUA*) genes in 8 molluscan species. **B & C.** The tissue-wide expression  
 625 patterns of *DYH* genes and *TUA* genes. Abbreviations: G, gill; D, digestive gland; A,  
 626 adductor muscle; M, mantle; F, foot; S, siphon.

627

628

629

630

631

632

633

634

635

636

637

638

639

640

641

642

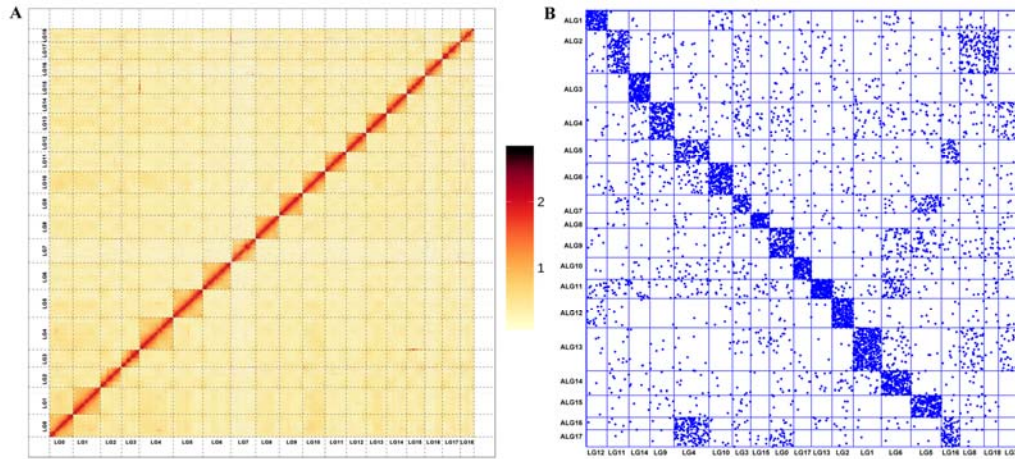

643

644

645

646

647

648

649

650

651

652

653

654

655

656

657

658

659

660

661

662

663

664

665

**Figure 4. A.** Hi-C interaction heat map of of *S. constricta*. **B.** Chromosome-based macro-synteny between *S. constricta* and the 17 presumed bilaterian ALGs retrieved from Simakov et al. (2013).

666 **Supplementary materials:**

667 **Table S1.** Summary of the genomic sequencing reads

668 **Table S2.** Statistics of Illumina short reads coverage

669 **Table S3.** Summary genomic completeness by CEGMA

670 **Table S4.** Summary genomic completeness by BUSCO

671 **Table S5.** Summary of Illumina transcriptome sequencing data

672 **Table S6.** Summary of clean reads mapping

673 **Table S7.** Summary of PacBio full-length transcriptome sequencing

674 **Table S8.** Summary of the gene prediction results

675 **Table S9.** Summary of the non-coding RNA annotation

676 **Figure S1.** Genome survey of *Sinonovacula constricta* using 17-mer analysis

677 **Figure S2.** Volcano map of differentially expressed genes

678 **Figure S3.** Dot plot of GO enrichment of differentially expressed genes

679 **Figure S4.** Dot plot of KEGG pathway enrichment of differentially expressed gen

680



**A**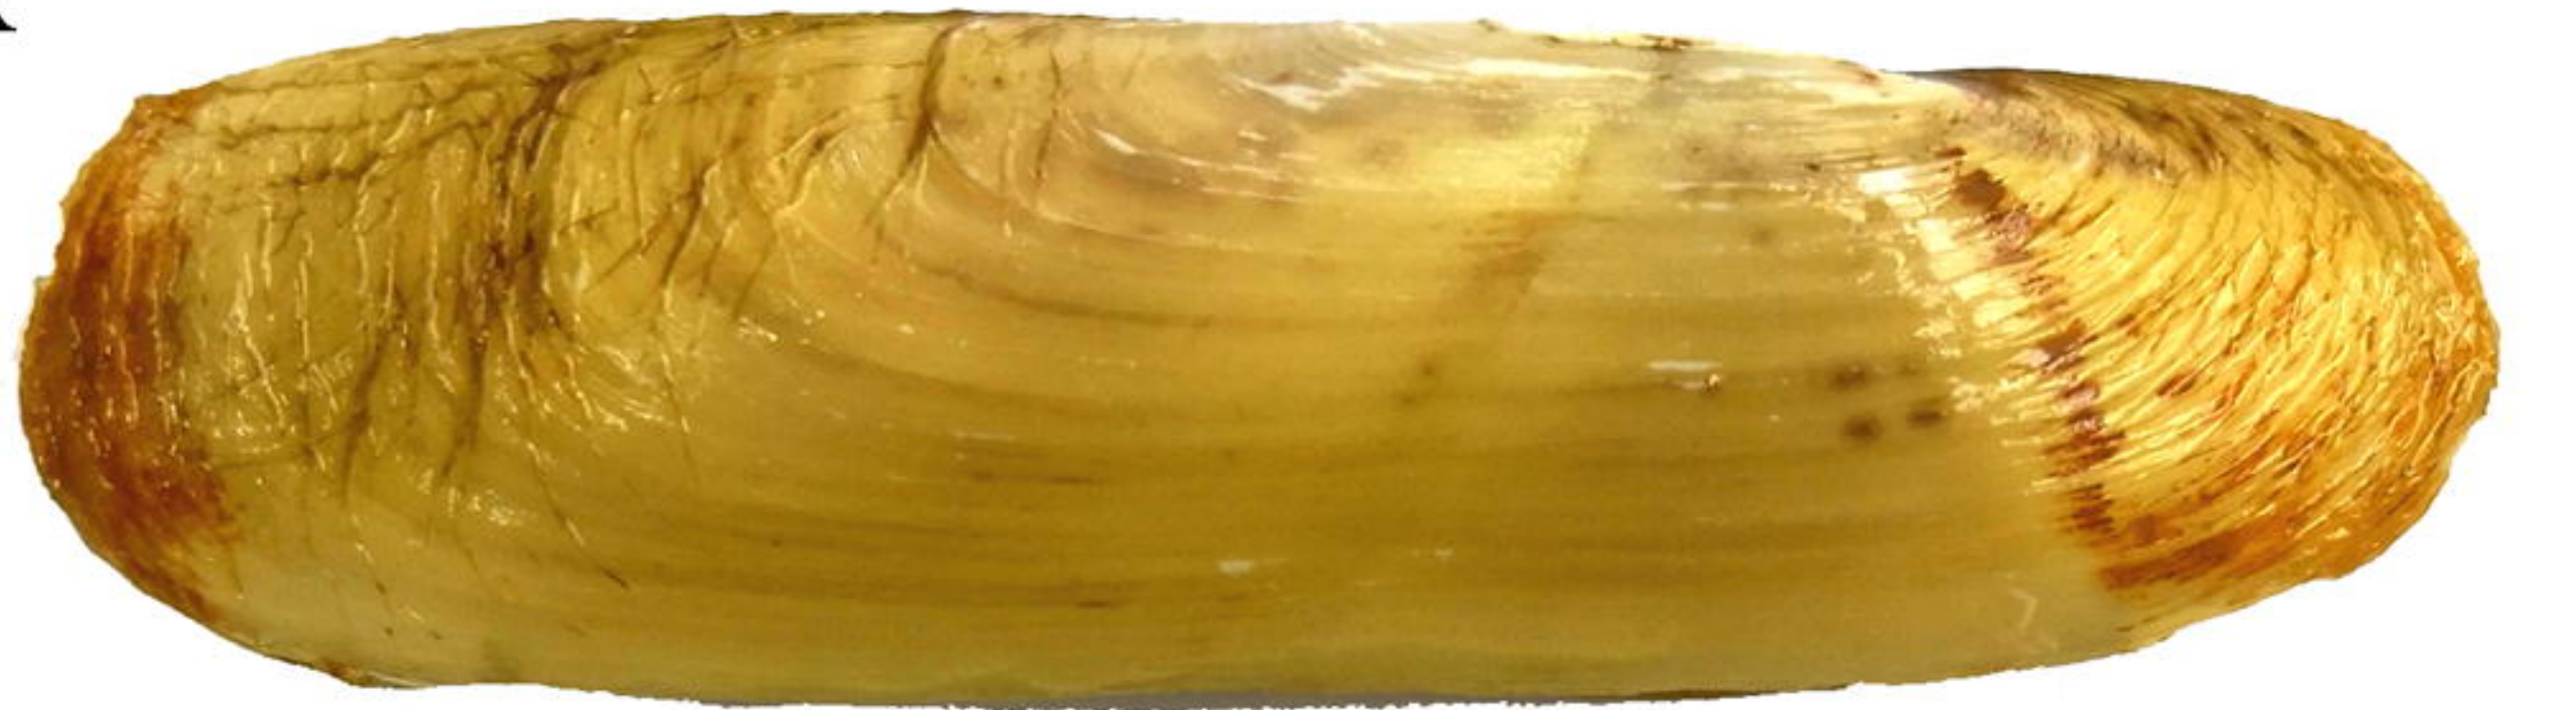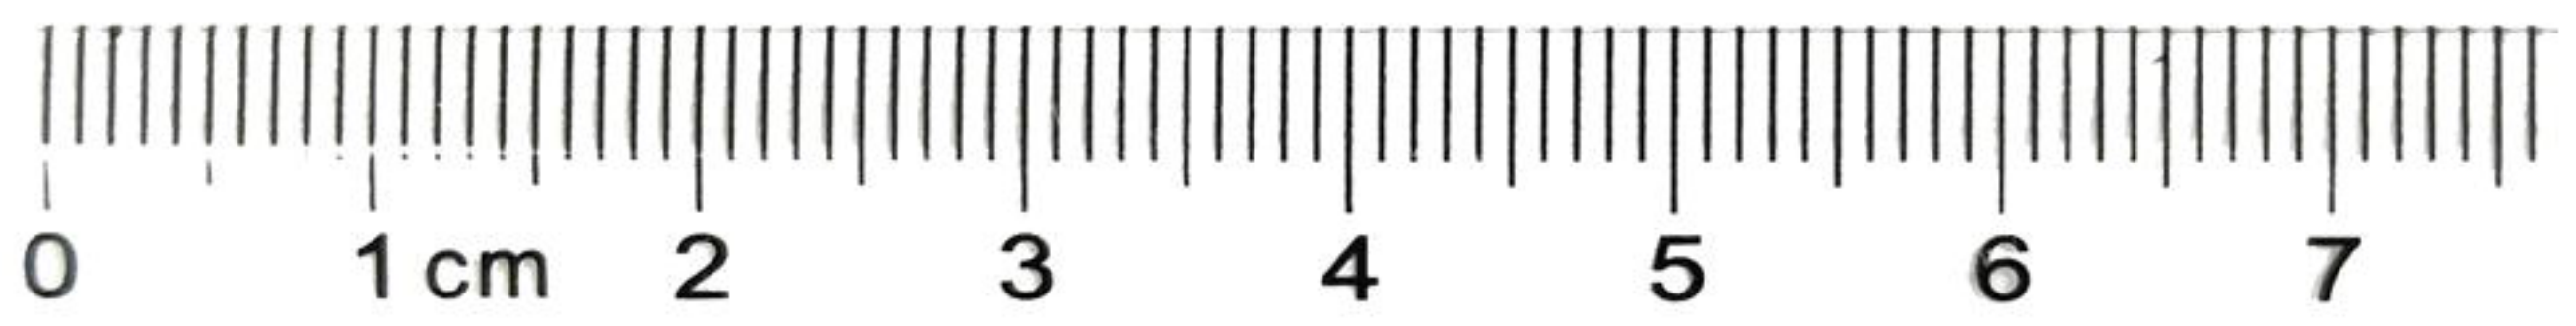

bioRxiv preprint doi: <https://doi.org/10.1101/735142>; this version posted August 16, 2019. The copyright holder for this preprint (which was not certified by peer review) is the author/funder, who has granted bioRxiv a license to display the preprint in perpetuity. It is made available under aCC-BY-NC-ND 4.0 International license.

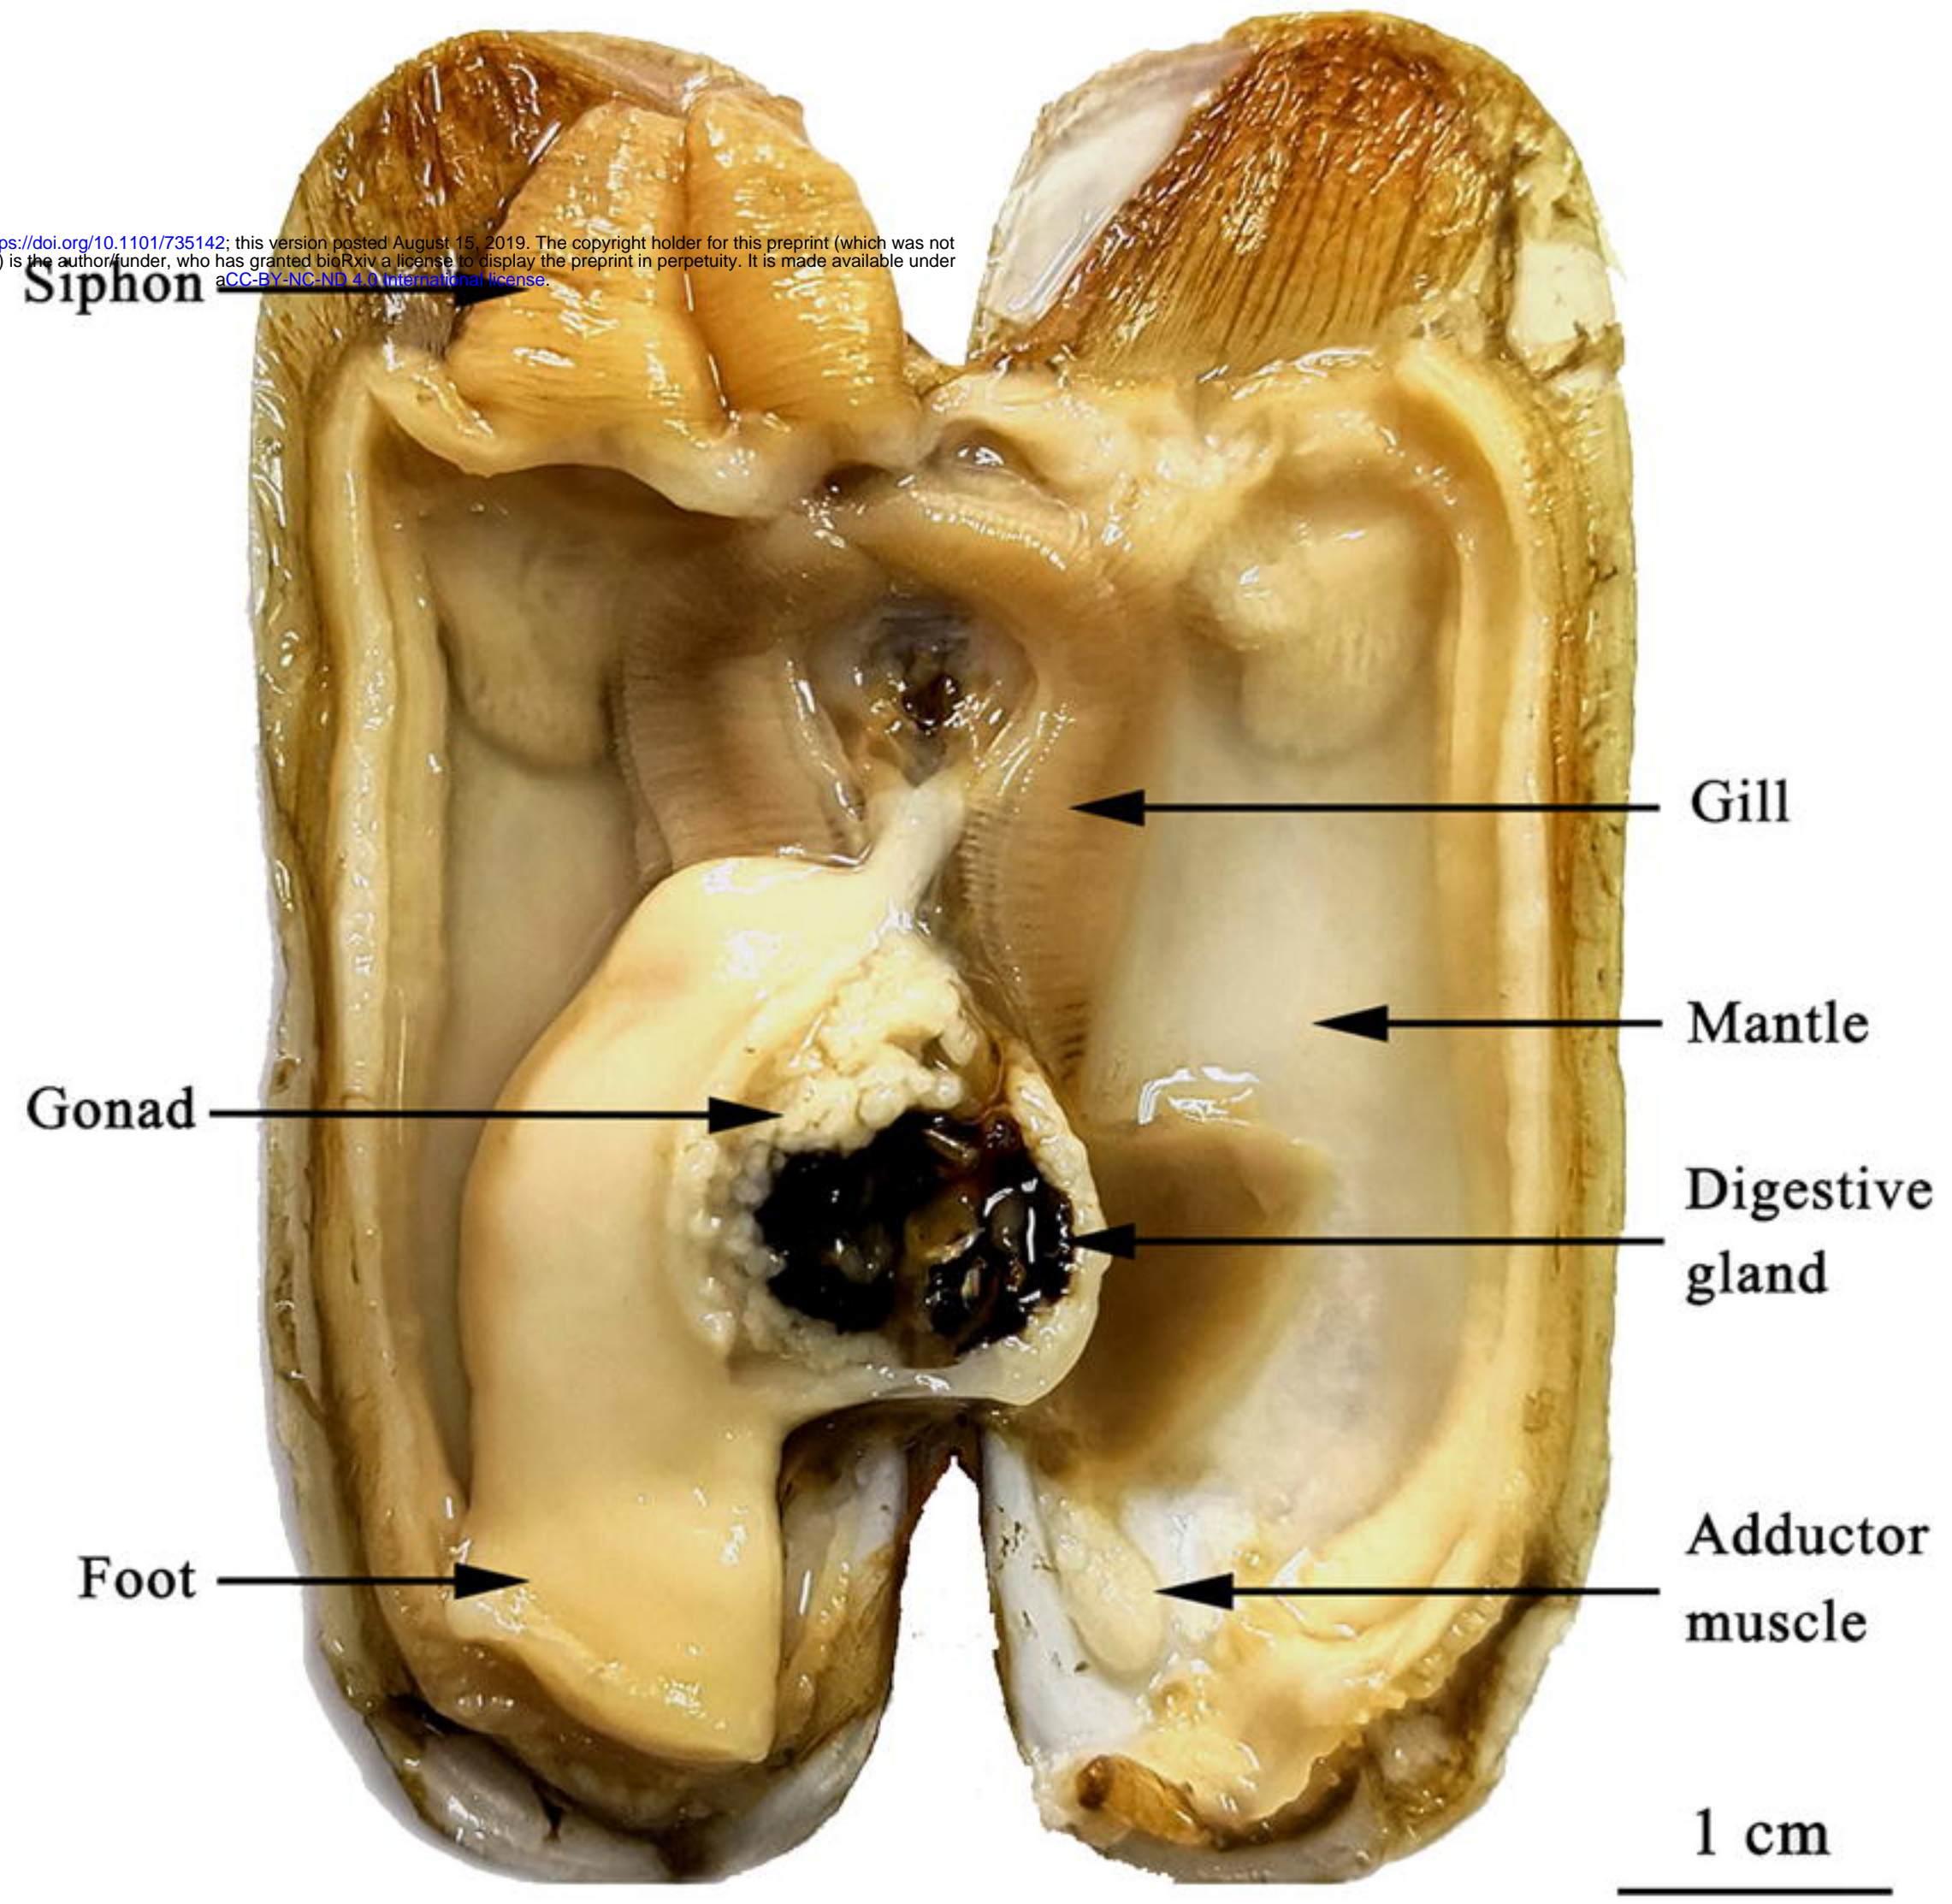**B**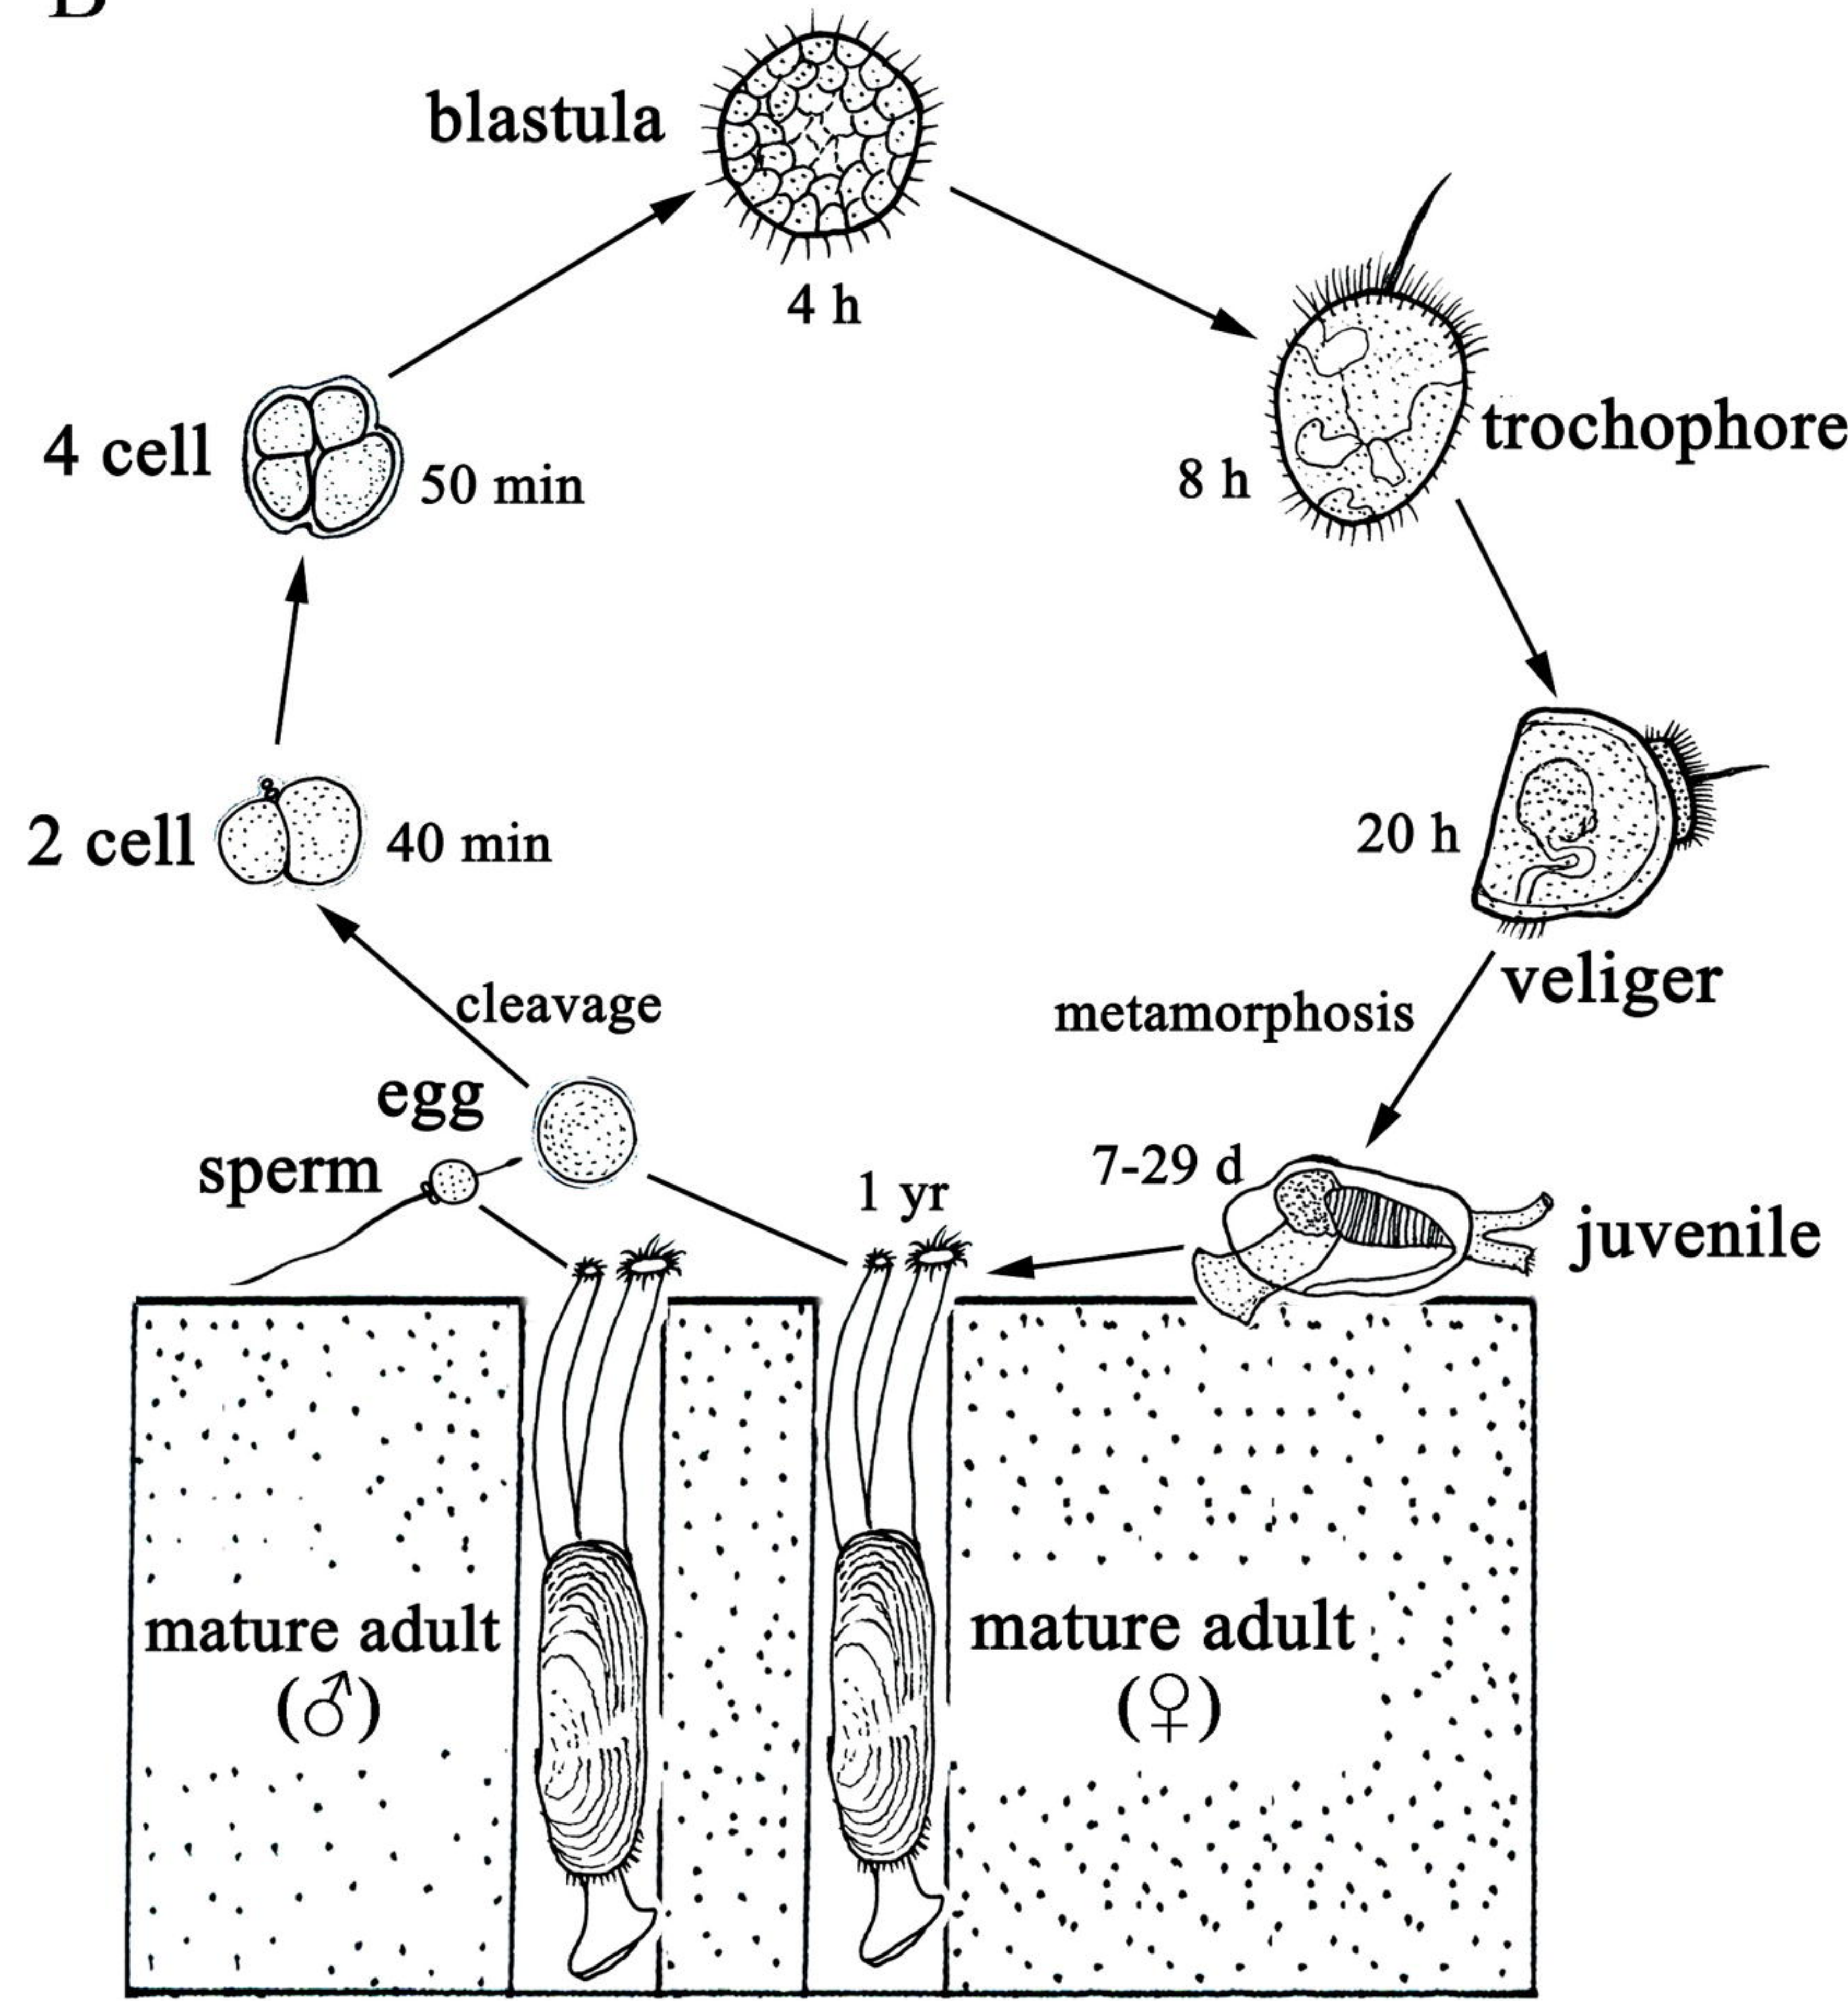

# Gene Families

Expansion/Contraction

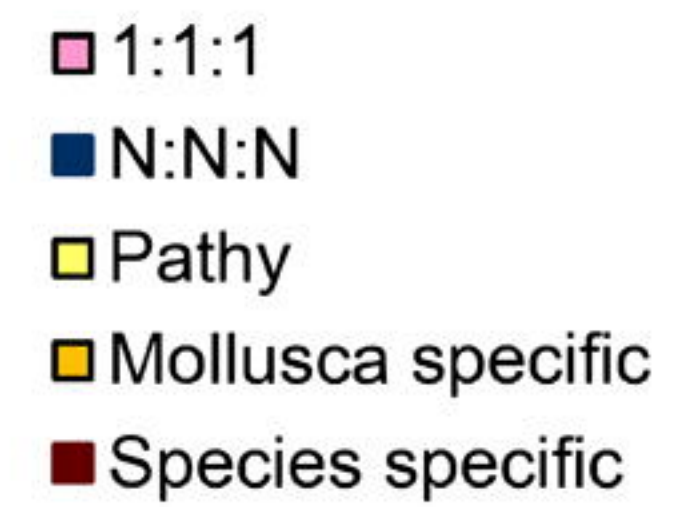

bioRxiv preprint doi: <https://doi.org/10.1101/735142>; this version posted August 15, 2019. The copyright holder for this preprint (which was not certified by peer review) is the author/funder, who has granted bioRxiv a license to display the preprint in perpetuity. It is made available under aCC-BY-NC-ND 4.0 International license.

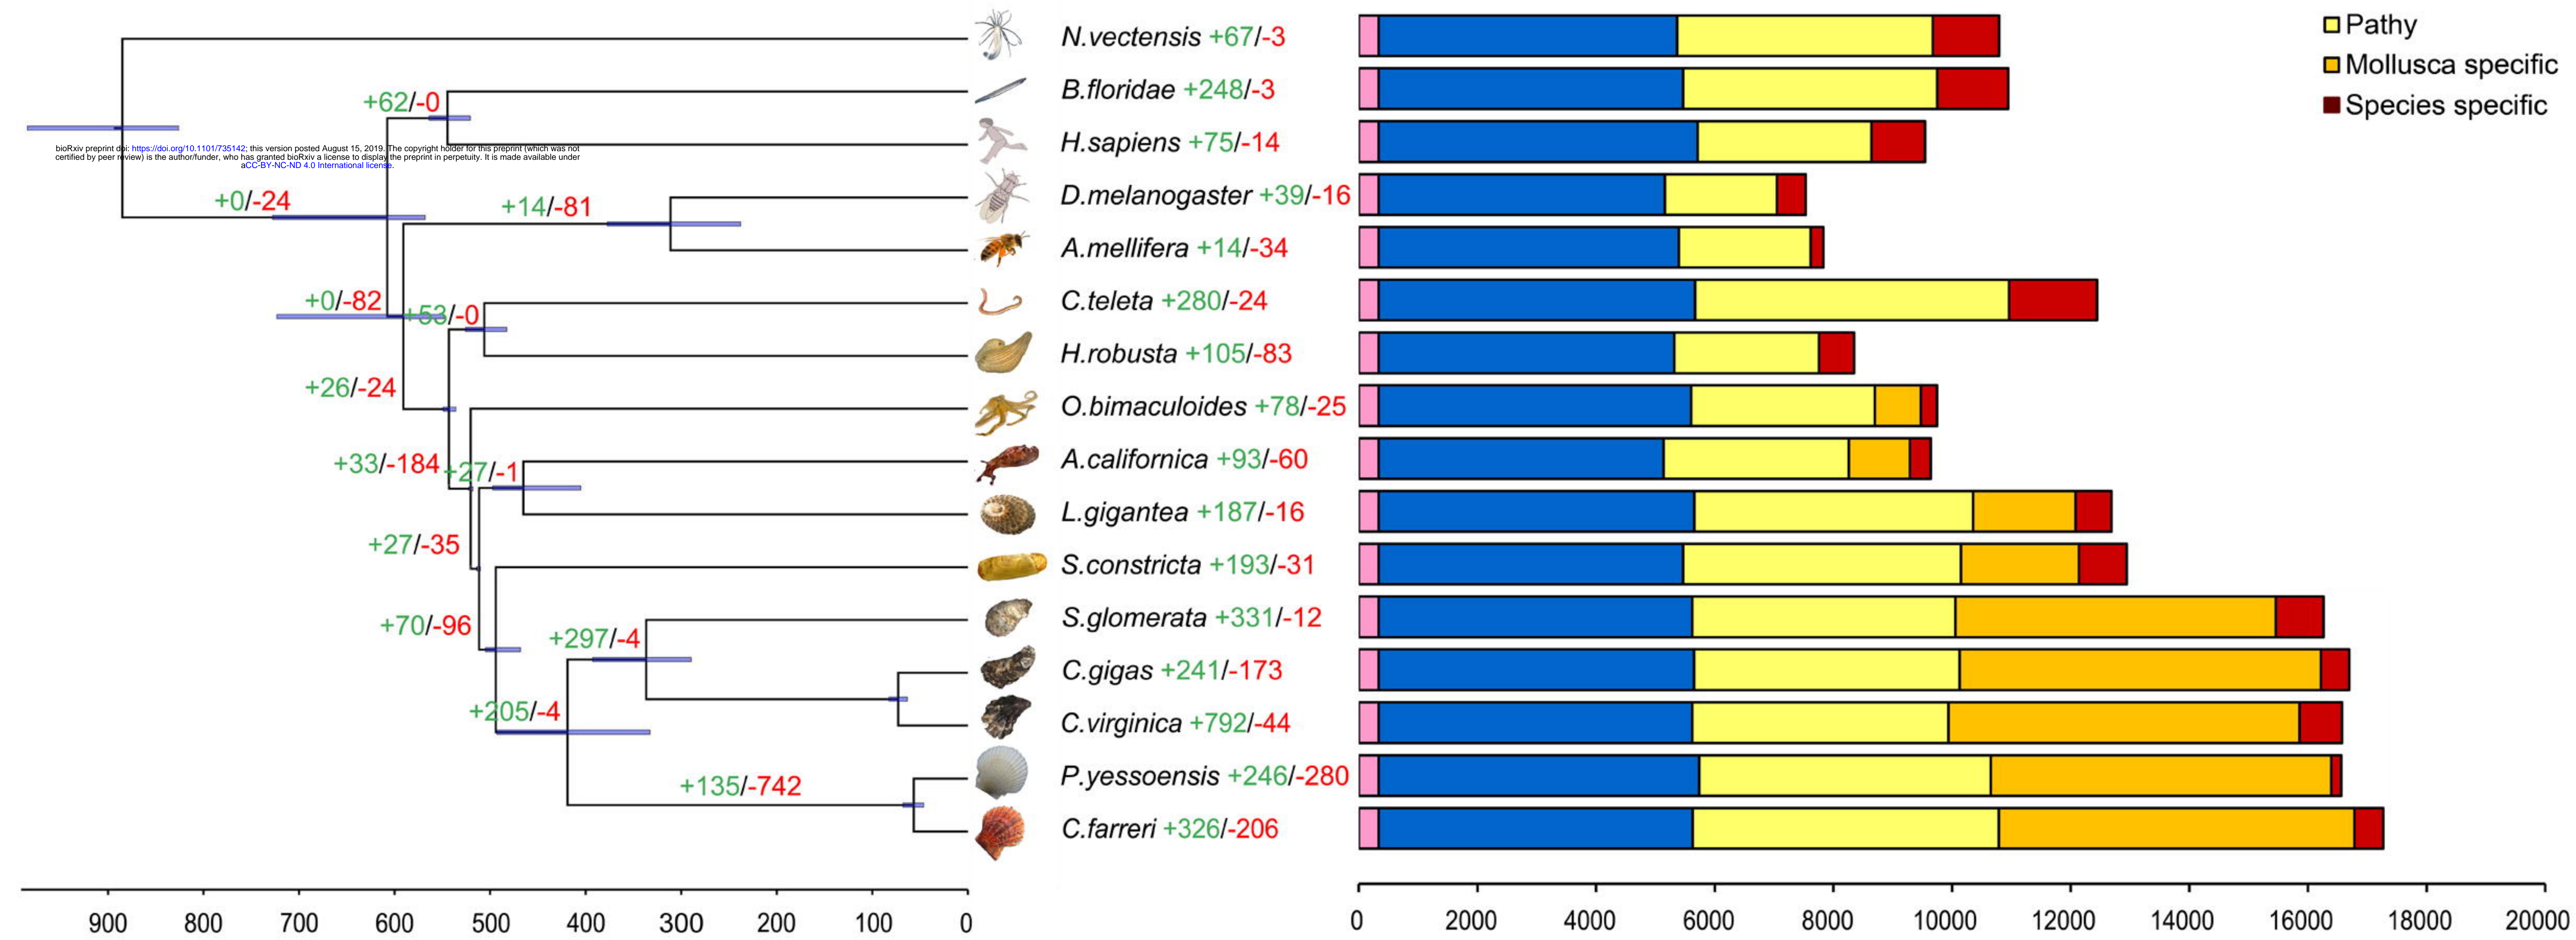

**A**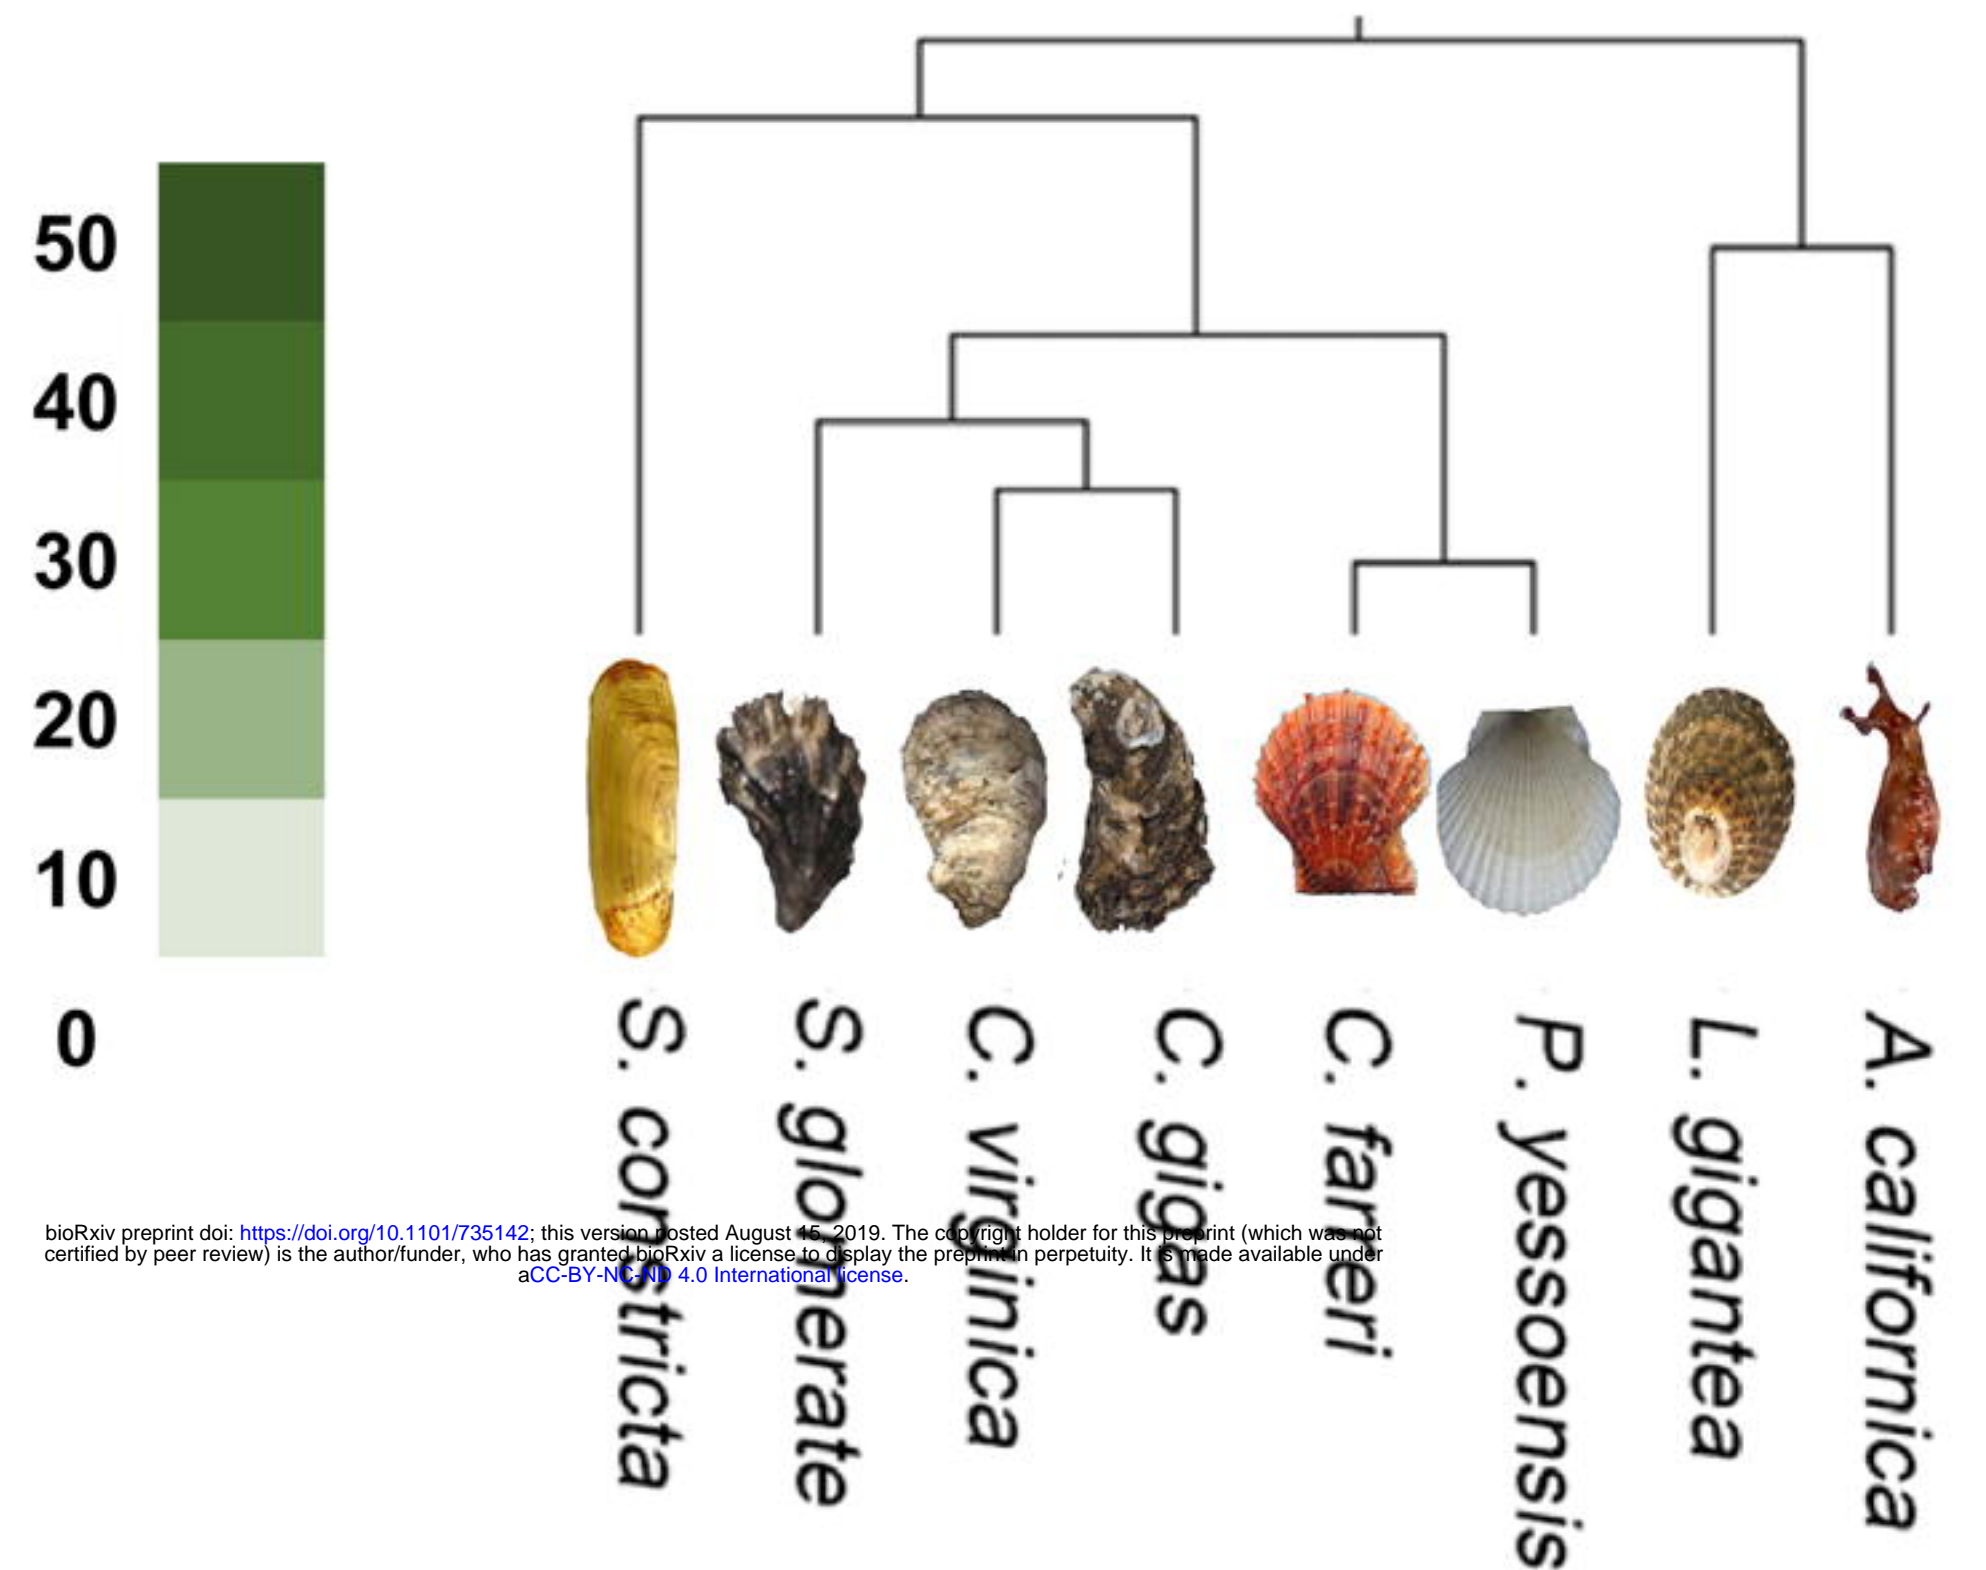

bioRxiv preprint doi: <https://doi.org/10.1101/735142>; this version posted August 4, 2019. The copyright holder for this preprint (which was not certified by peer review) is the author/funder, who has granted bioRxiv a license to display the preprint in perpetuity. It is made available under aCC-BY-NC-ND 4.0 International license.

|    |    |    |    |    |    |    |   |            |
|----|----|----|----|----|----|----|---|------------|
| 33 | 22 | 18 | 14 | 12 | 15 | 18 | 8 | <i>DYH</i> |
| 18 | 7  | 4  | 8  | 10 | 11 | 46 | 7 | <i>TUA</i> |

**B**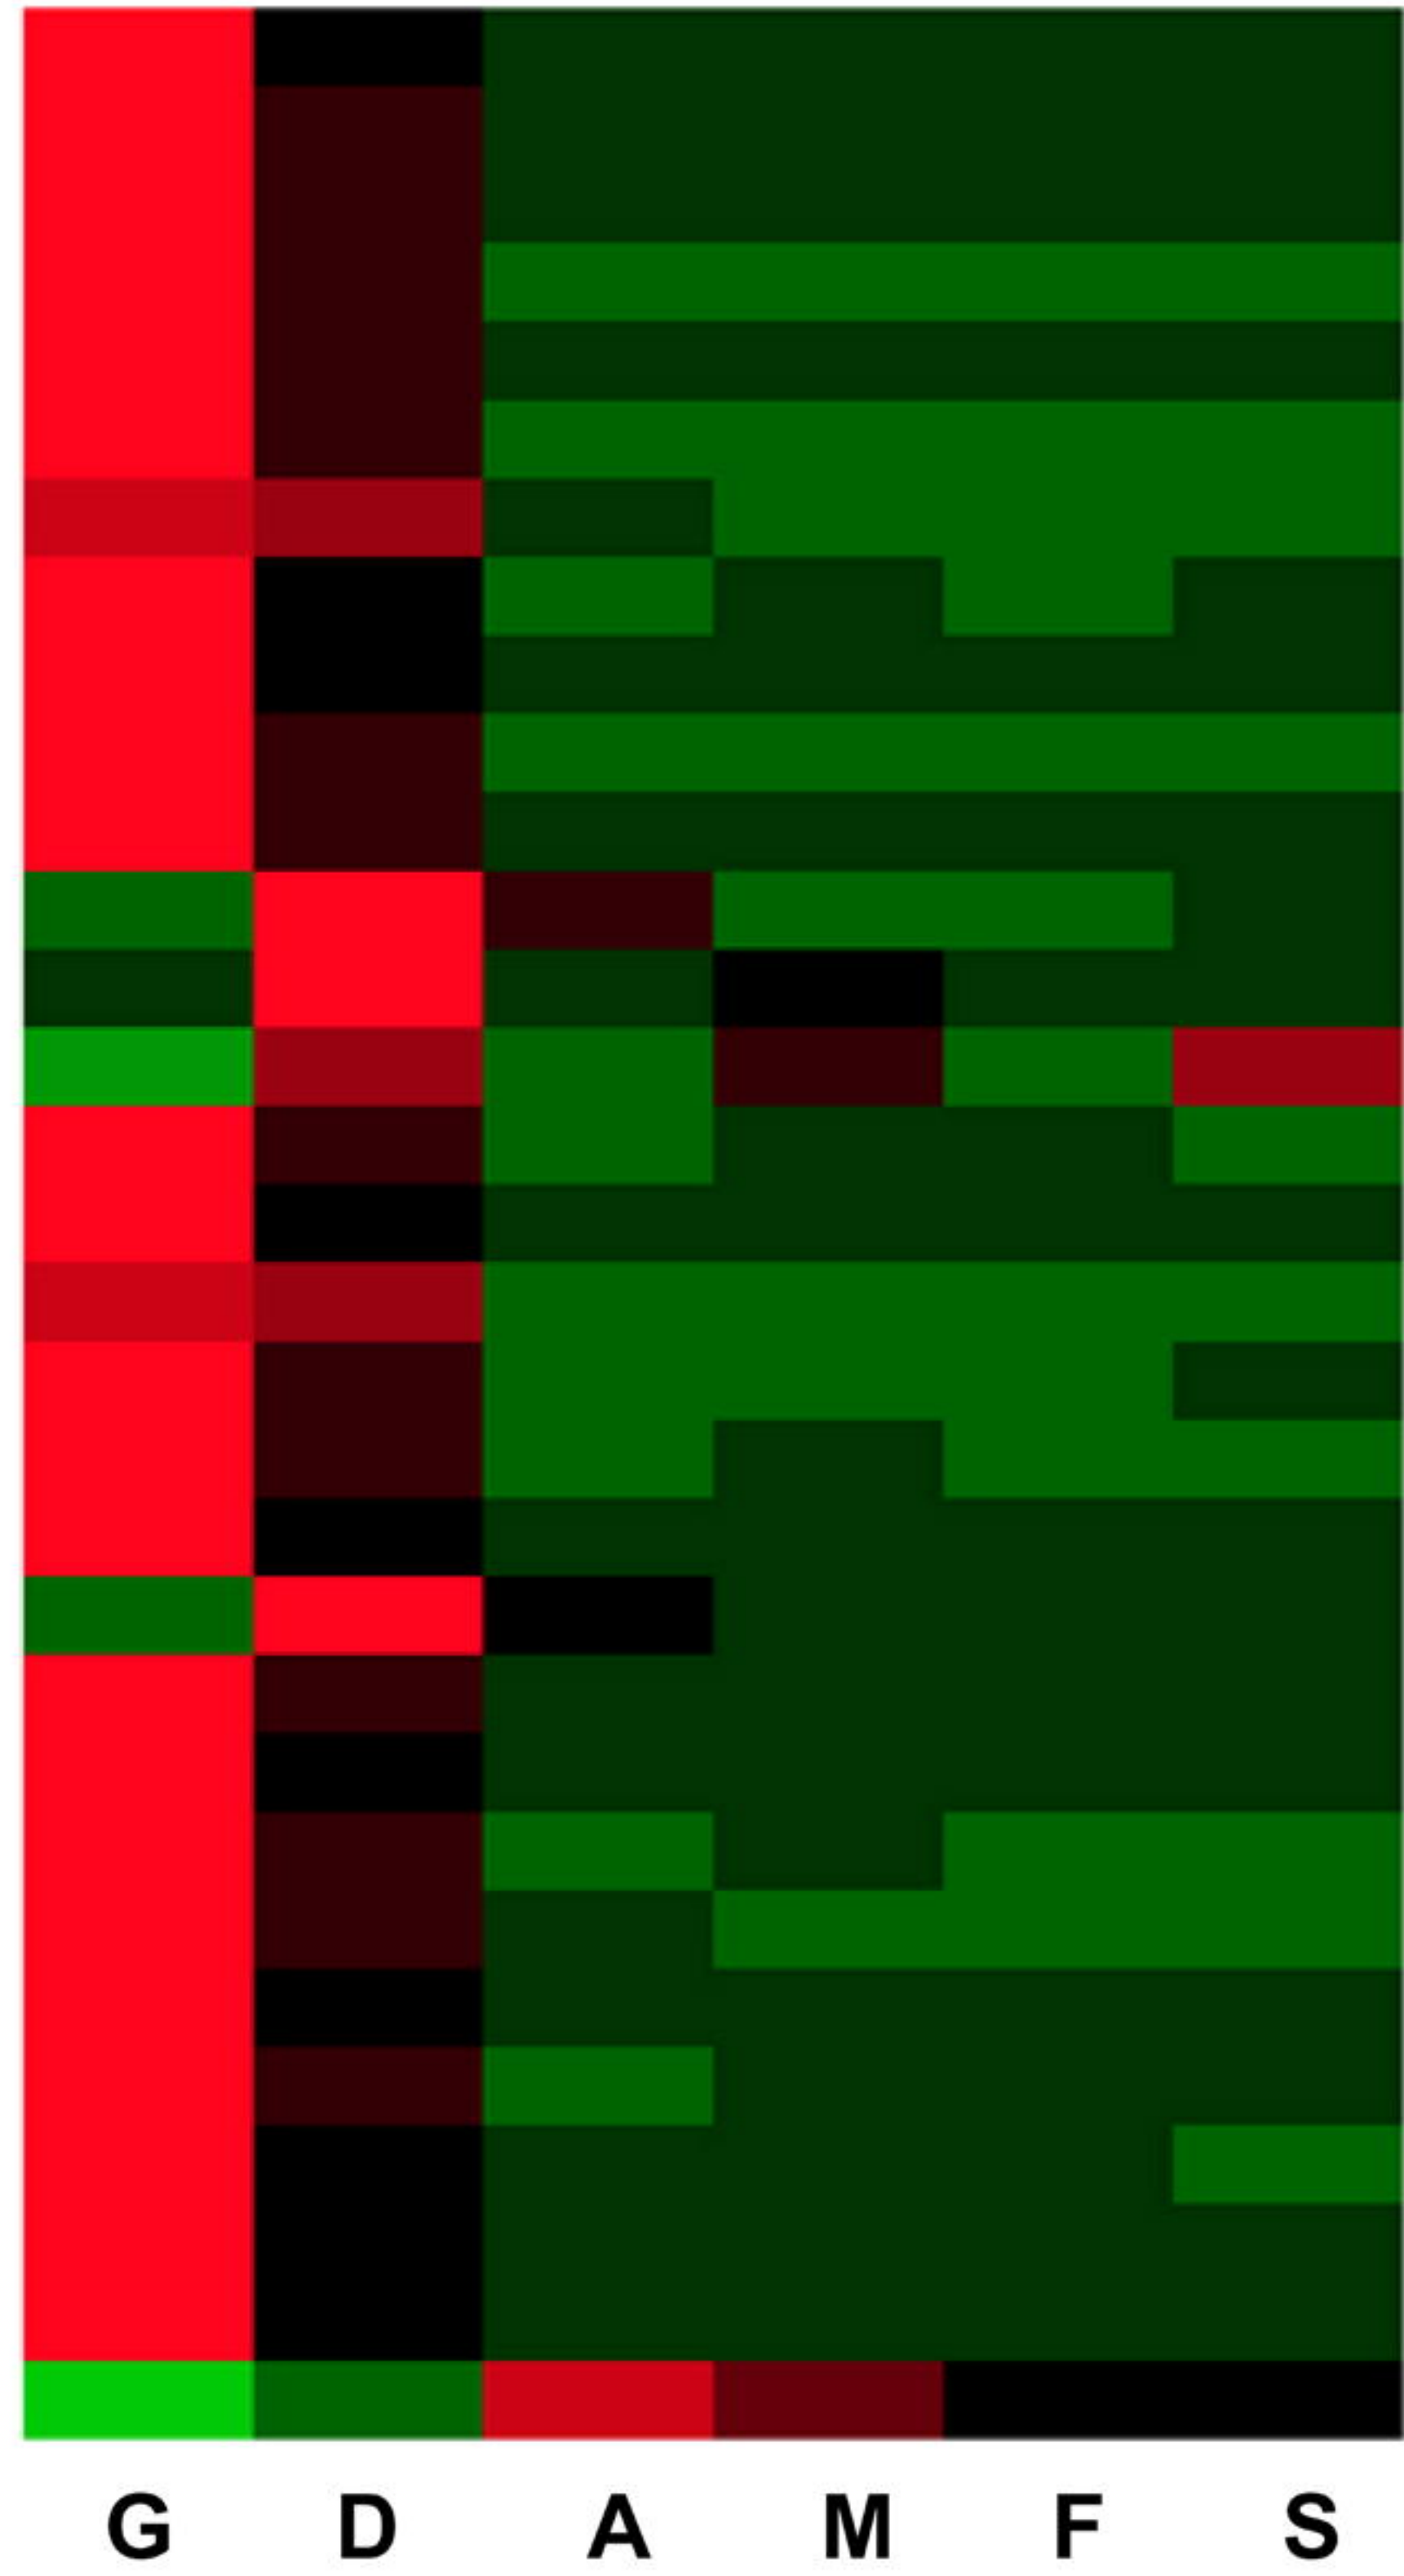**C**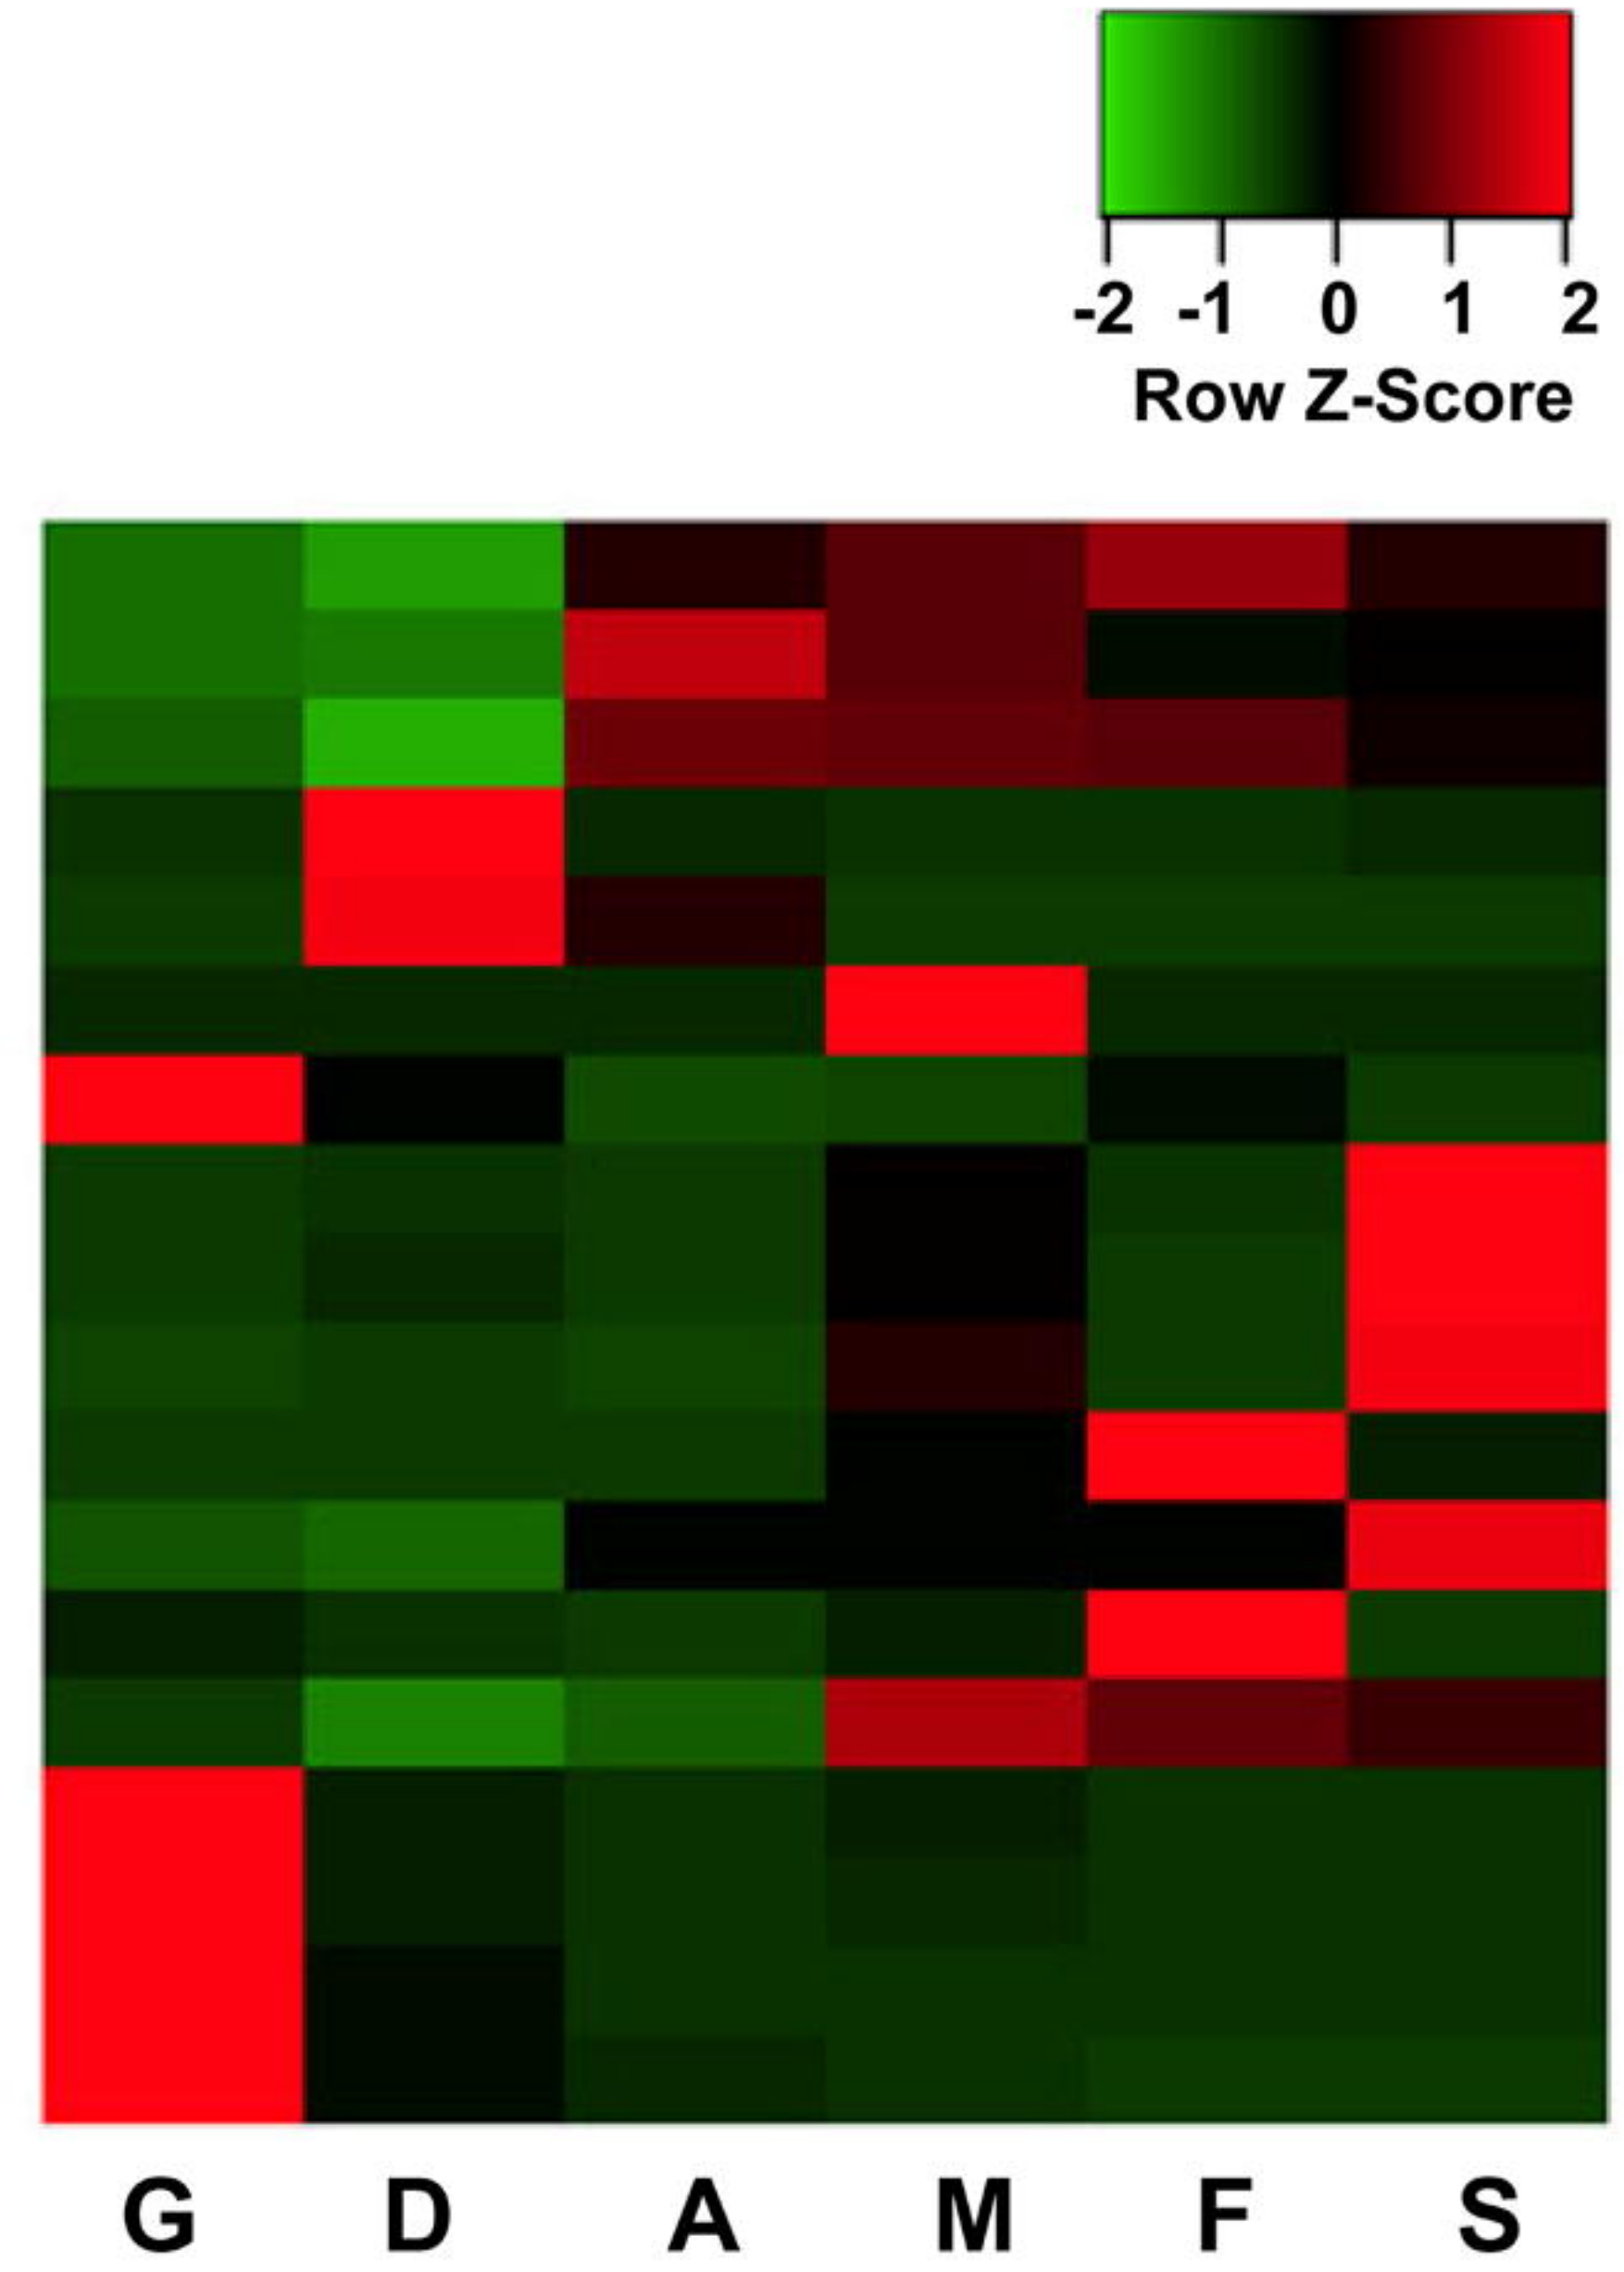

**A**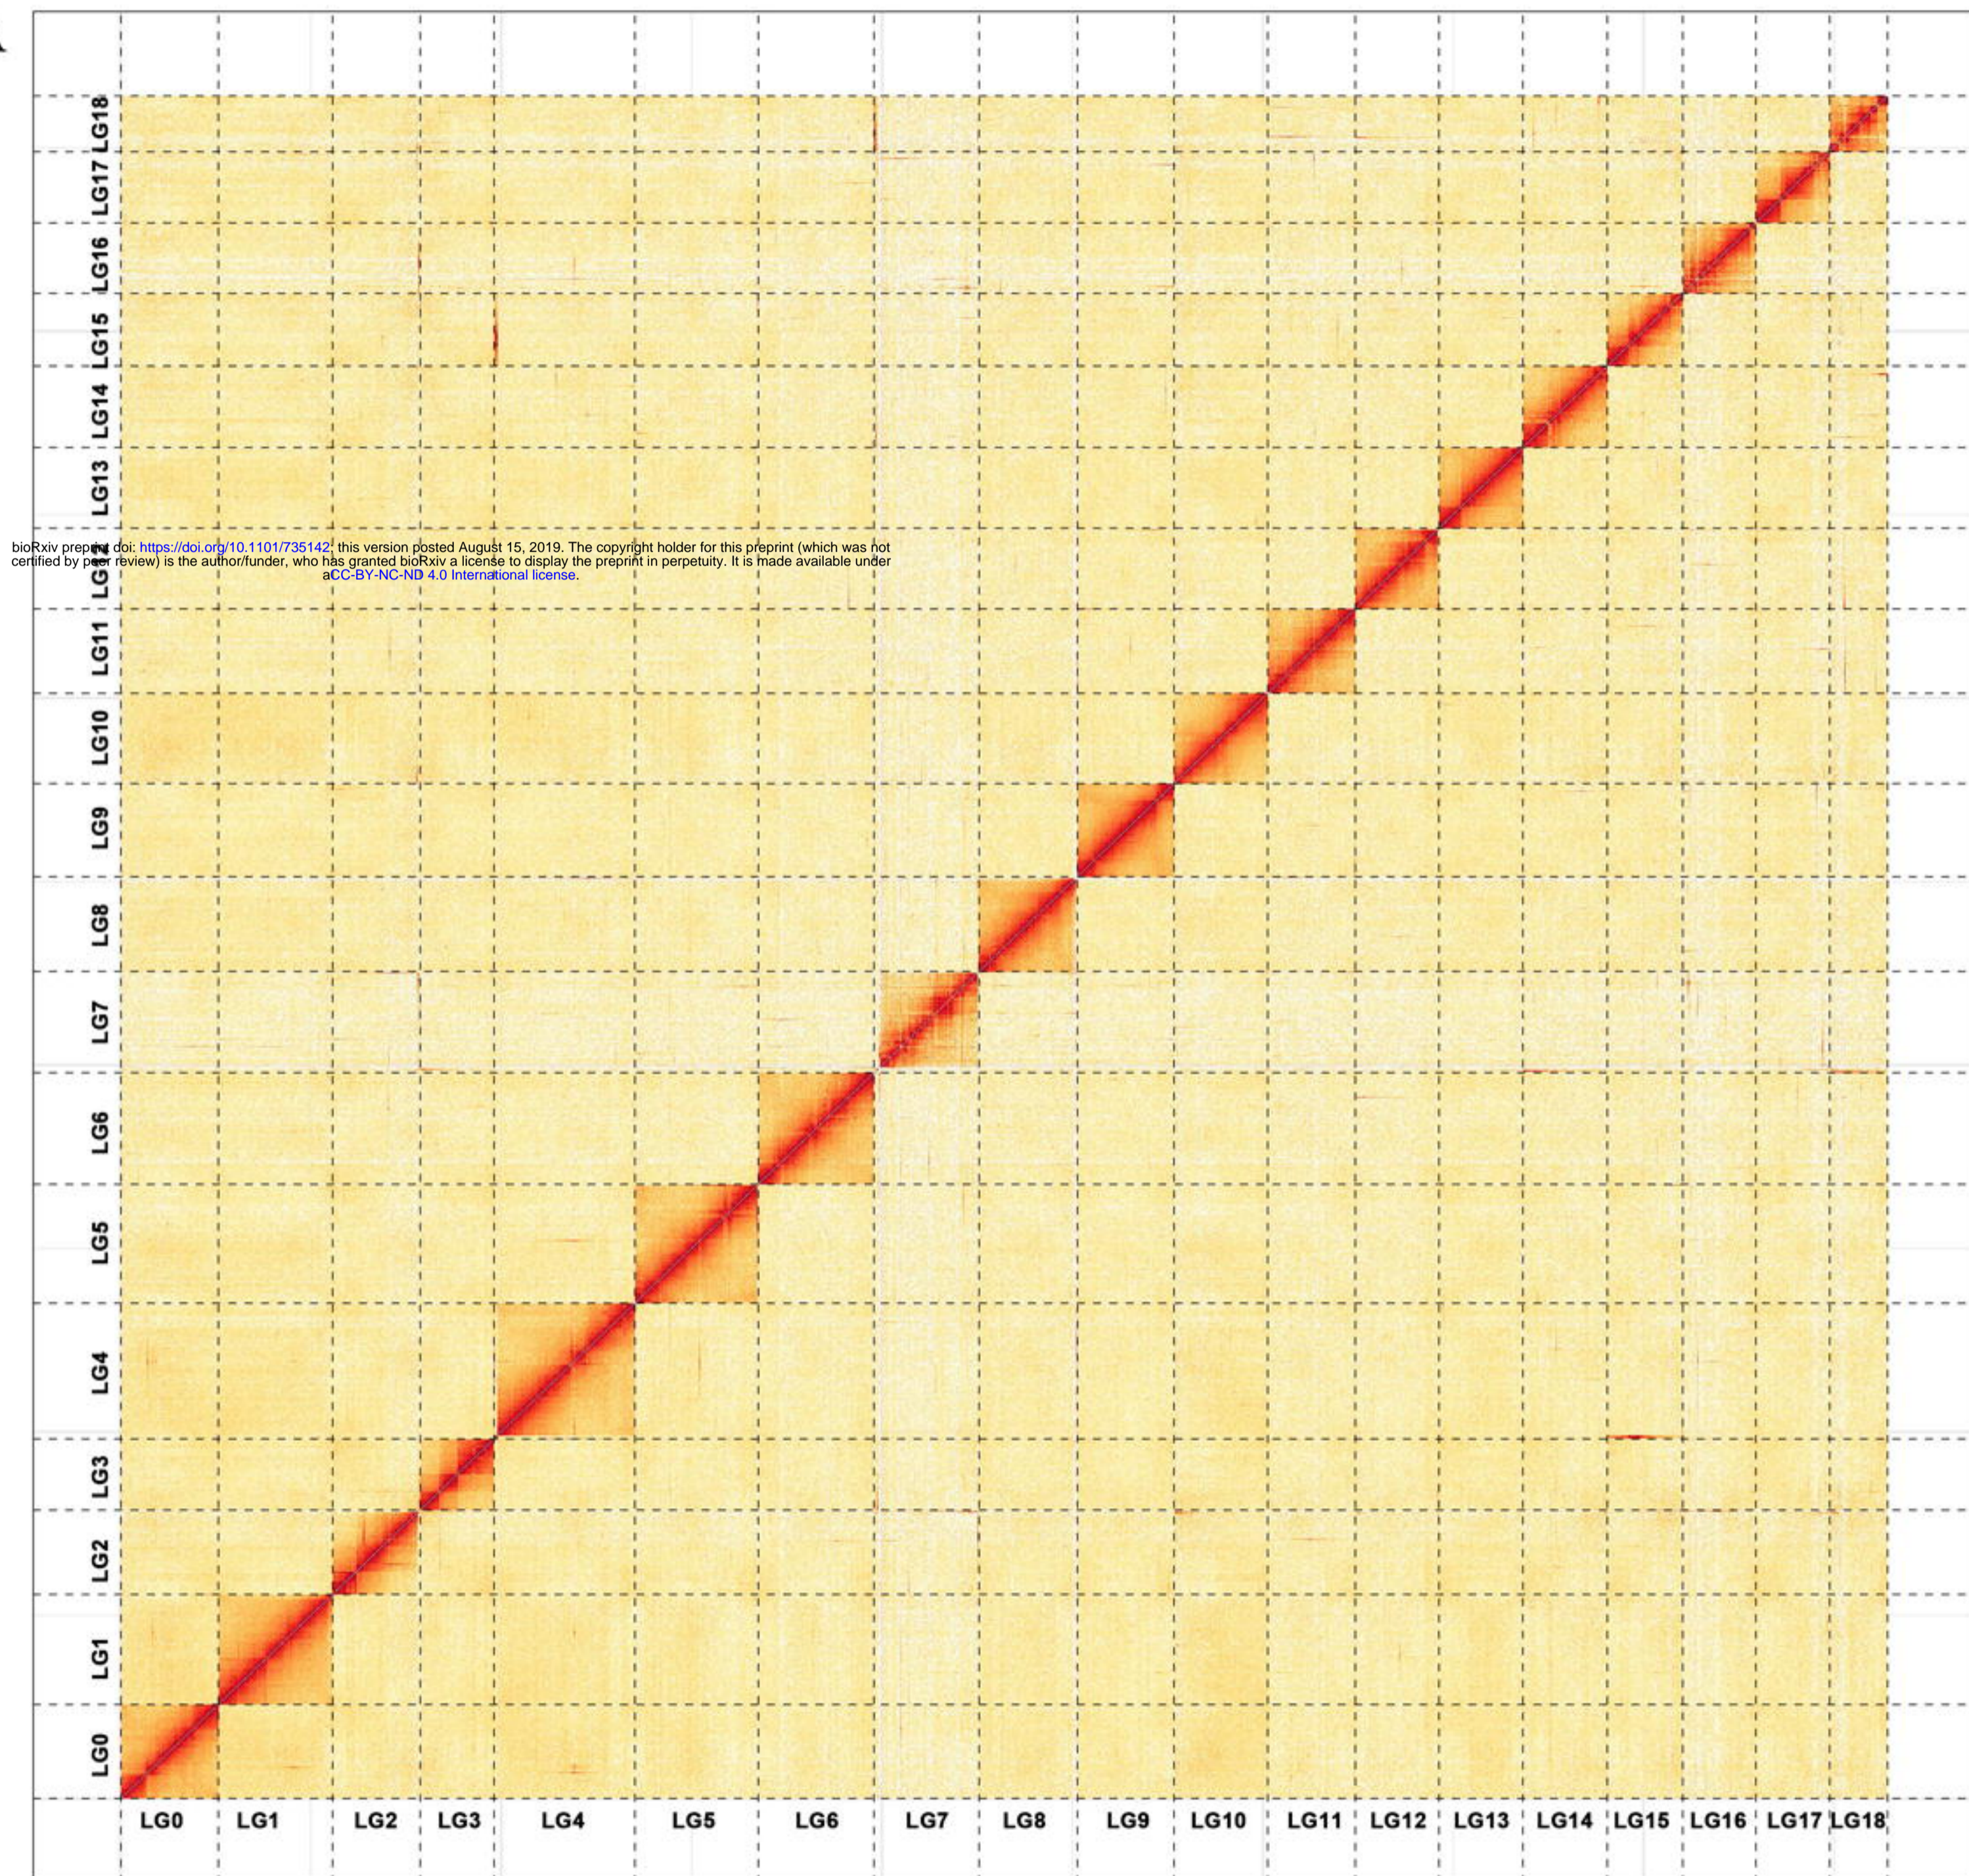**B**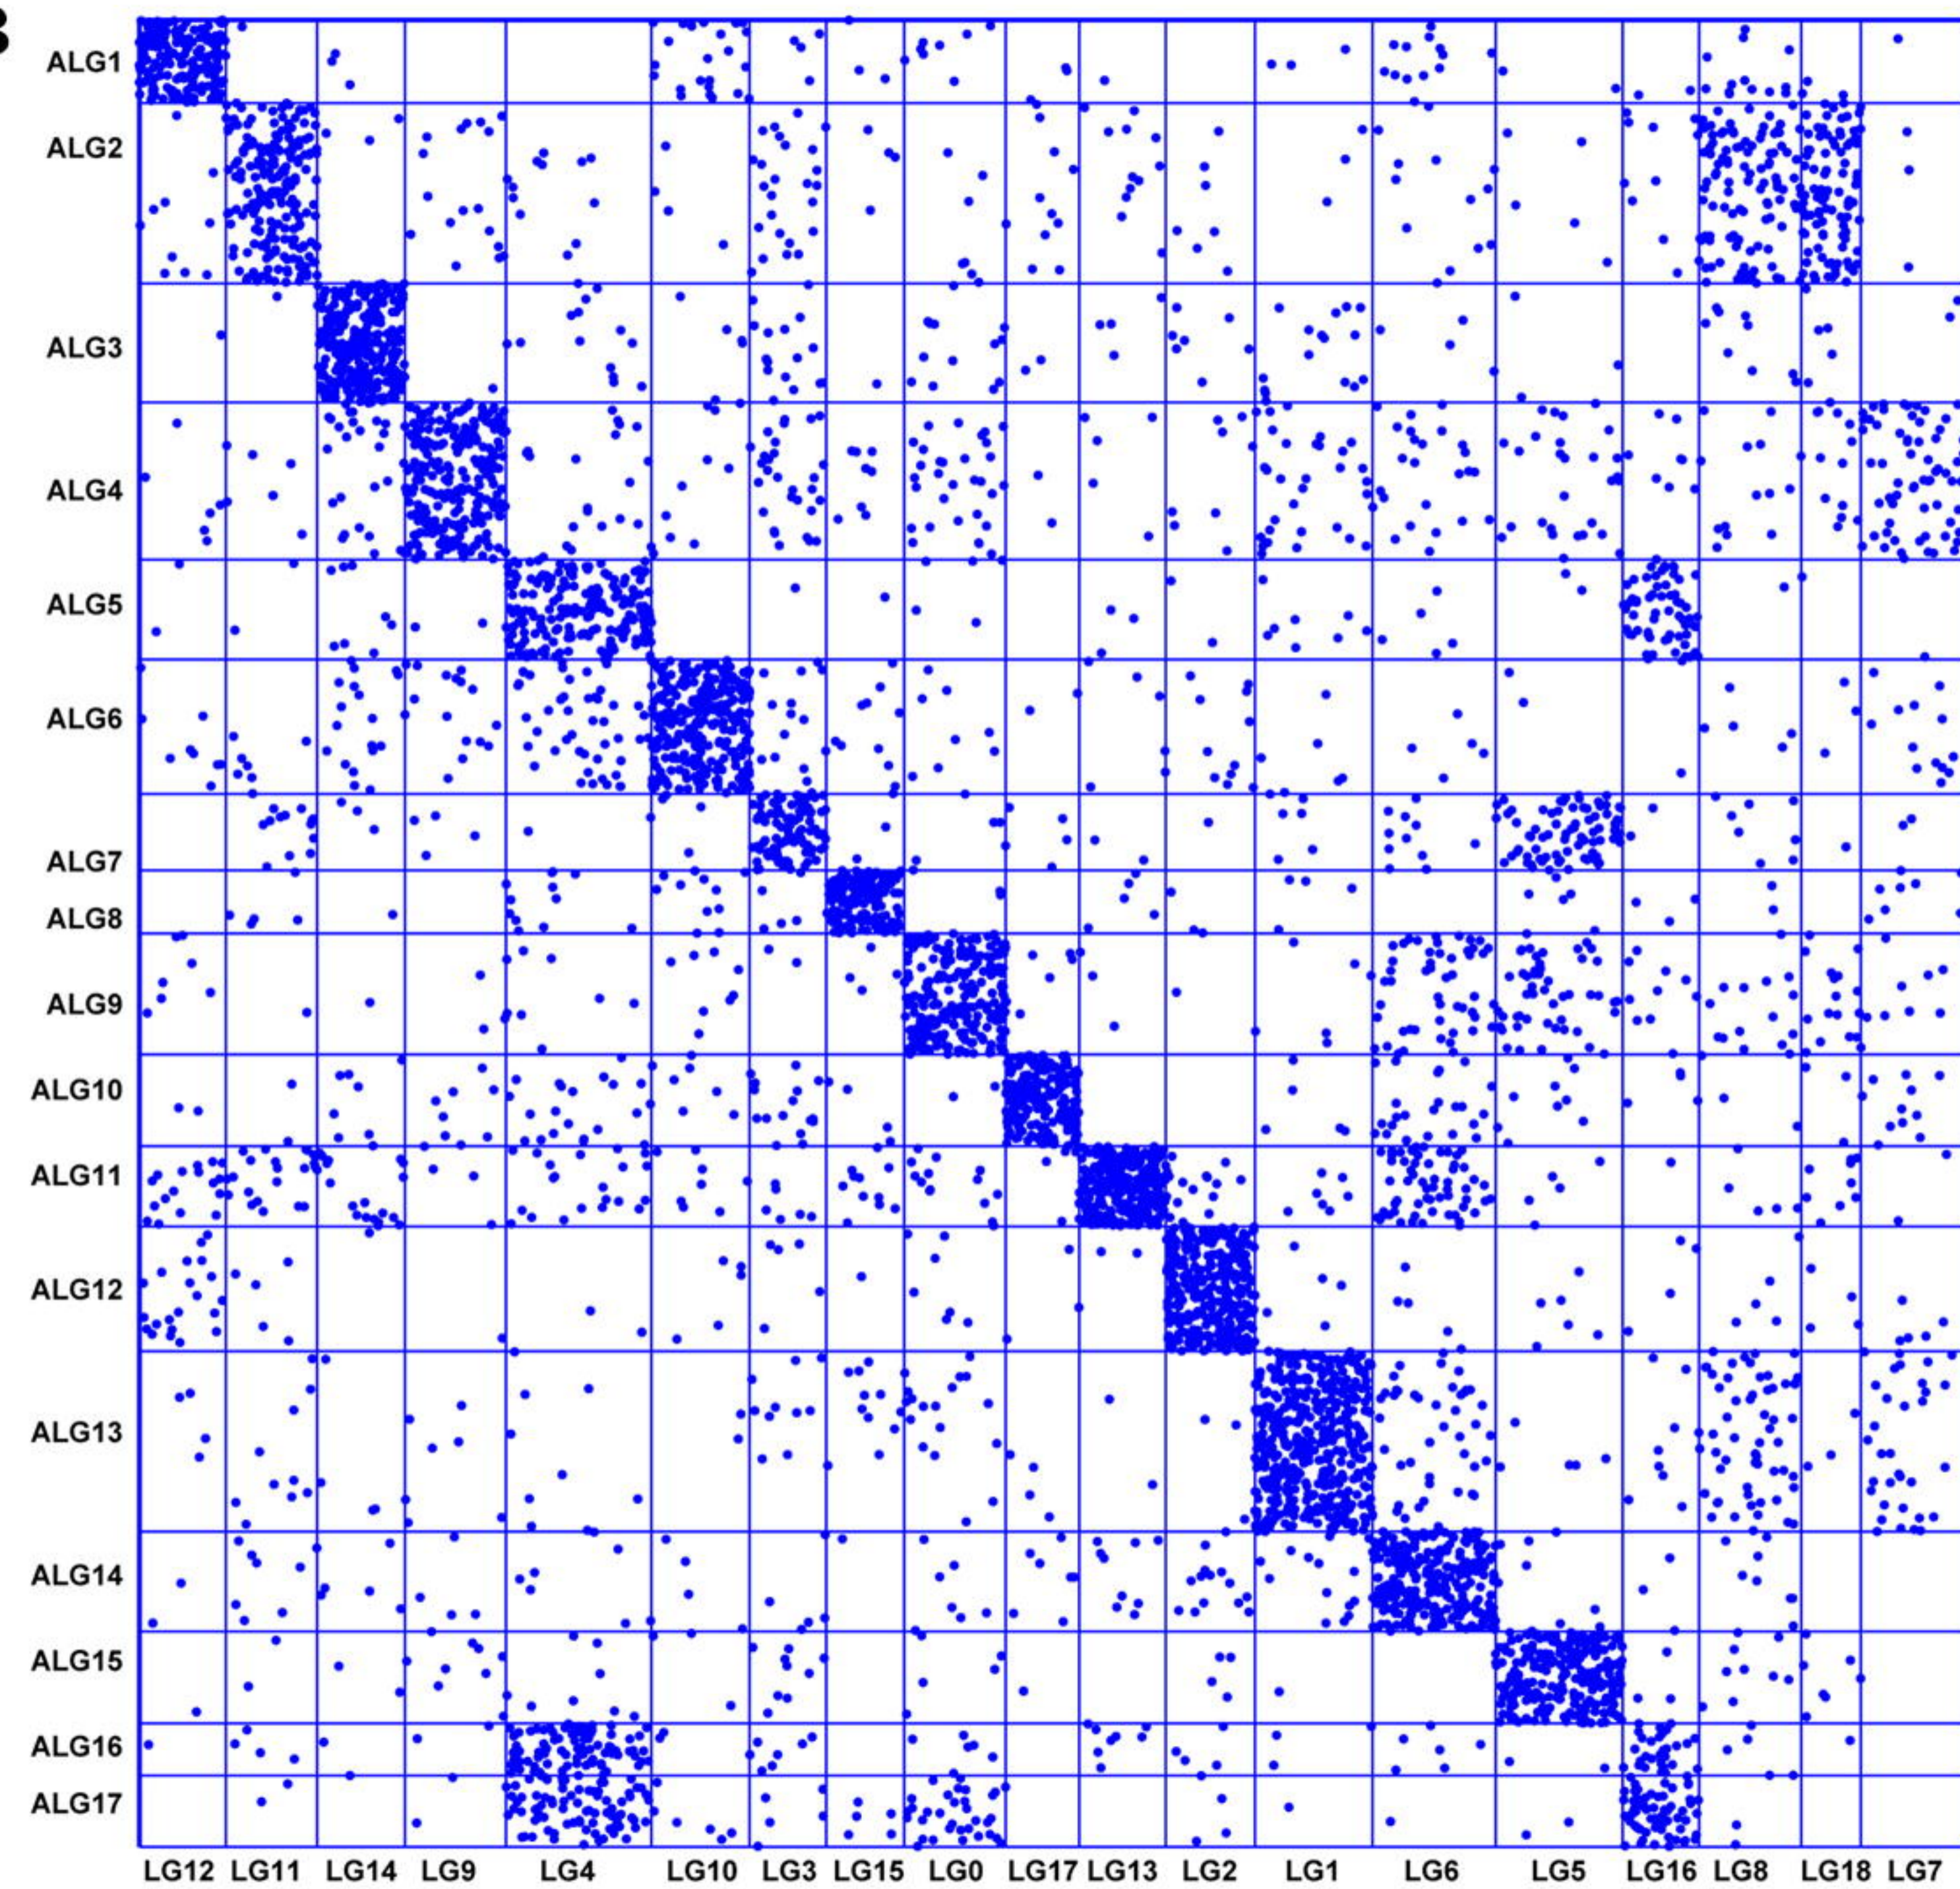

Source: https://www.biorxiv.org/content/10.1101/735142v1.full.pdf
